# Supplementary material for: The important contribution of secondary formation and biomass burning to oxidized organic nitrogen (OON) in a polluted urban area: insights from in situ measurements of a chemical ionization mass spectrometer (CIMS)
Source: Copernicus journal article supplement (doi:10.5194/acp-23-8855-2023), 2023-08-09
Supplement: Supplementary file 1 [file acp-23-8855-2023-supplement.pdf]

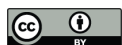

*Supplement of*

**The important contribution of secondary formation and biomass burning to oxidized organic nitrogen (OON) in a polluted urban area: insights from in situ measurements of a chemical ionization mass spectrometer (CIMS)**

Yiyu Cai et al.

*Correspondence to:* Weiwei Hu ([weiwei.hu@gig.ac.cn](mailto:weiwei.hu@gig.ac.cn)) and Bin Yuan ([byuan@jnu.edu.cn](mailto:byuan@jnu.edu.cn))

The copyright of individual parts of the supplement might differ from the article licence.

## Text S1: Intercomparison of AMS-derived organic nitrates based on multiple methods

Nitrate signals ( $\text{NO}^+$ ,  $\text{NO}_2^+$ ,  $\text{HNO}_3^+$ ) measured by a high-resolution time-of-flight aerosol mass spectrometer (HR-ToF-AMS) include both organic nitrates and inorganic nitrates. Many methods were established to separate the total measured nitrates from inorganic nitrates and particle-phase organic nitrates (i.e., the particle-phase nitrate functional group,  $\text{pOrgNO}_{3, \text{AMS}}$ ), i.e.,  $\text{NO}_2^+/\text{NO}^+$  ratio method (Farmer et al., 2010), Positive Matrix Factorization (PMF) method (Hao et al., 2014; Sun et al., 2012; Xu et al., 2015) and Thermodenuder (TD) method (Xu et al., 2021). In this study, these three methods were applied to quantify  $\text{pOrgNO}_{3, \text{AMS}}$ . Note that in agreement with Dancy and Reidy (2007), we interpreted the absolute value of the Pearson correlation coefficient as (i) no correlation, if  $|r| \leq 0.1$ ; (ii) weak correlation, if  $0.1 < |r| \leq 0.3$ ; (iii) moderate correlation, if  $0.3 < |r| \leq 0.7$ ; (iv) strong correlation, if  $0.7 < |r| \leq 1$ ; and finally, (v) perfect correlation, if  $|r| = 1$ .

(1)  **$\text{NO}_2^+/\text{NO}^+$  ratio method.** The organic nitrate and inorganic can be detected as  $\text{NO}^+$  and  $\text{NO}_2^+$  ions in the HR-ToF-AMS. Previous studies have reported much lower  $\text{NO}_2^+/\text{NO}^+$  ratios of  $\text{pOrgNO}_{3, \text{AMS}}$  ( $R_{\text{ON}}$ ) than that of inorganic nitrates, i.e.,  $\text{NH}_4\text{NO}_3$  ( $R_{\text{NH}_4\text{NO}_3}$ ) (Boyd et al., 2015; Farmer et al., 2010; Fry et al., 2013; Sato et al., 2010). Fry et al. (2013) quantified that the  $R_{\text{ON}}$  ratio is 2.25 times lower than the  $R_{\text{NH}_4\text{NO}_3}$  based on multiple results using different AMSs in chamber studies. Recently, Day et al. (2022) and Fry et al. (2018) summarized more studies and redefined the ratio  $R_{\text{NH}_4\text{NO}_3}/R_{\text{ON}}$  to be 2.75. The average  $R_{\text{NH}_4\text{NO}_3}$  was estimated to be 0.37 from the standard calibration of  $\text{NH}_4\text{NO}_3$ , which is quite stable across this entire campaign. Then, the  $R_{\text{ON}}$  for this study was estimated to be 0.13 based on the  $R_{\text{NH}_4\text{NO}_3}/R_{\text{ON}}$  ratio of 2.75.

Thus, the fraction of  $\text{pOrgNO}_{3, \text{AMS}}$  in total nitrates ( $\text{ON}_{\text{frac}}$ ) measured by the AMS can be calculated as (Farmer et al., 2010):

$$\text{ON}_{\text{frac}} = \frac{(R_{\text{ambient}} - R_{\text{NH}_4\text{NO}_3})(1 + R_{\text{ON}})}{(R_{\text{ON}} - R_{\text{NH}_4\text{NO}_3})(1 + R_{\text{ambient}})} \quad (\text{S1})$$

where  $R_{\text{ambient}}$  is the  $\text{NO}_2^+/\text{NO}^+$  ratio of ambient nitrate. The final concentration of  $\text{pOrgNO}_{3, \text{AMS}}$  can be calculated based on total nitrates and  $\text{ON}_{\text{frac}}$ . To calculate the uncertainty of  $\text{ON}_{\text{frac}}$  with the  $\text{NO}_2^+/\text{NO}^+$  ratio method, ratios of 2.08 and 4.17 ( $R_{\text{ON}} = 0.18$  and  $0.09$ ) obtained from isoprene- and monoterpene-derived  $\text{pOrgNO}_{3, \text{AMS}}$ , were used for calculating the upper (mean  $0.85 \mu\text{g m}^{-3}$ ) and lower (mean  $0.53 \mu\text{g m}^{-3}$ ) bounds of  $\text{pOrgNO}_{3, \text{AMS}}$  (Xu et al., 2015; Xu et al., 2021), respectively. Thus, 27% was regarded as the average uncertainty of this method for the estimation  $\text{pOrgNO}_{3, \text{AMS}}$  in this study. When the ambient nitrate signal is high in ambient air (e.g.,  $>5 \mu\text{g m}^{-3}$ ), the high nitrate signal was mainly contributed by the inorganic ammonium nitrate (Day et al., 2022). This leads to that the  $\text{NO}_2^+/\text{NO}^+$  ratio of ambient nitrate is similar to that of pure inorganic ammonium nitrate, thus resulting in a large uncertainty in  $\text{pOrgNO}_{3, \text{AMS}}$  estimation. This issue had been fully addressed in the method paper on how

to estimate pOrgNO<sub>3, AMS</sub> from AMS measurement (Day et al., 2022). The larger uncertainty of estimated pOrgNO<sub>3, AMS</sub> by AMS  
 60 under high nitrate signal periods has also been found in other ambient studies (Yu et al., 2019; Zhu et al., 2016).

(2) **PMF method.** It is well known that the PMF analysis can be used for source appointment and estimation of various  
 organic factors, e.g., primary organic aerosol and secondary organic aerosol (SOA). Combining the OA spectral matrix with NO<sup>+</sup>  
 and NO<sub>2</sub><sup>+</sup> ions detected by AMS, different OA factors including organic NO<sup>+</sup> and NO<sub>2</sub><sup>+</sup> ions can provide insights regarding the  
 relative contributions of pOrgNO<sub>3, AMS</sub> and inorganic nitrates (Sun et al., 2012; Xu et al., 2015). Therefore, the concentrations of  
 65 pOrgNO<sub>3, AMS</sub> (NO<sub>org</sub><sup>+</sup> and NO<sub>2,org</sub><sup>+</sup>) are equal to the sum of NO<sup>+</sup> and NO<sub>2</sub><sup>+</sup> via Eqs. (S2) and (S3) (Xu et al., 2015):

$$\text{NO}_{2,\text{org}}^+ = \sum \left( [\text{OA factor}]_i \times f_{\text{NO}_2,i} \right) \quad (\text{S2})$$

$$\text{NO}_{\text{org}}^+ = \sum \left( [\text{OA factor}]_i \times f_{\text{NO},i} \right) \quad (\text{S3})$$

where [OA factor]<sub>i</sub> is the mass concentration of OA factor *i*, *f*<sub>NO<sub>2</sub>,i</sub> and *f*<sub>NO,i</sub> are the mass fractions of NO<sub>2</sub><sup>+</sup> and NO<sup>+</sup> in each factor,  
 respectively.

(3) **TD method.** The method was developed for the estimation of pOrgNO<sub>3, AMS</sub> from the measurement of HR-ToF-AMS  
 70 coupled with a thermodenuder based on the difference of volatility between pOrgNO<sub>3, AMS</sub> (NO<sub>x,org</sub><sup>+</sup>) and inorganic nitrates (NO<sub>x,inorg</sub><sup>+</sup>)  
 in particles (Xu et al., 2021). It is assumed that (I) the remaining mass loading of nitrate fragments was dominated by NO<sub>x,org</sub><sup>+</sup>,  
 while NO<sub>x,inorg</sub><sup>+</sup> evaporated completely at T = 90°C due to the higher volatility of NO<sub>x,inorg</sub><sup>+</sup> than NO<sub>x,org</sub><sup>+</sup> (Huffman et al., 2008; Ng  
 et al., 2017); (II) The C<sub>x</sub>H<sub>y</sub>N<sub>z</sub><sup>+</sup> and C<sub>x</sub>H<sub>y</sub>O<sub>z</sub>N<sub>p</sub><sup>+</sup> ions were supposed to have similar volatility as NO<sub>x,org</sub><sup>+</sup> which dominate the  
 75 remaining fragments at T > 90°C (Xu et al., 2021). Combined with the two assumptions, the mass concentration of pOrgNO<sub>3, AMS</sub>  
 ([NO<sub>3,org</sub>]) in the ambient atmosphere can be determined by Eq. (S4) (Xu et al., 2021):

$$[\text{NO}_{3,\text{org}}] = \frac{[\text{NO}_3]_{T=90^\circ\text{C}}}{\text{MFR}_{\text{CHN}^+ + \text{CHON}^+ T=90^\circ\text{C}}} \quad (\text{S4})$$

The subscript “T = 90°C” denotes the mass concentration or the mass fraction remaining (MFR) of fragments at T = 90°C.

The intercomparison of pOrgNO<sub>3, AMS</sub> based on these three methods and the particle-phase oxidized organic nitrogen (pOON)  
 80 measured by an iodide chemical ionization time-of-flight mass spectrometer installed with a Filter Inlet for Gases and AEROSols  
 (FIGAERO-CIMS) in this campaign are presented in Fig. S2. The average concentrations of pOrgNO<sub>3, AMS</sub> and pOON are shown  
 in Table S2. Generally, the pOrgNO<sub>3, AMS</sub> derived from PMF method increases with total nitrates and is largely overestimated

compared to other methods during the high nitrate periods. The  $p\text{OrgNO}_{3,\text{AMS}}$  estimated from the TD method correlates well ( $R = 0.73$ ) with that from  $\text{NO}_2^+/\text{NO}^+$  ratio method. However, the former exhibits noisier especially under low nitrate periods probably  
 85 due to the large uncertainty of the lower mass remaining fraction for  $p\text{OrgNO}_{3,\text{AMS}}$  at higher temperature ( $>90^\circ\text{C}$ ).  $T = 90^\circ\text{C}$  was assumed to represent the temperature mentioned above at which inorganic nitrates have been evaporated completely. However, this might not be the case in some environments (Huffman et al., 2008). The drawback of  $\text{NO}_2^+/\text{NO}^+$  ratio method is the slightly large uncertainty under high  $\text{NO}_x$  conditions such as during 25–26 October 2018 (Fig. S2a).

Finally, we chose  $\text{NO}_2^+/\text{NO}^+$  ratio method for more analysis in the main text given its smooth profile and relative stable  
 90 estimation of total  $p\text{OrgNO}_{3,\text{AMS}}$  (Yu et al., 2019). The average mass fraction of  $p\text{OrgNO}_{3,\text{AMS}}$  to total nitrates is 15% and that mass fraction increases with decreasing concentration of total nitrates (Fig. S2b), indicating the dominant role of pON chemistry under low nitrate atmospheric environment.

### Text S2: The calculation of the production rate of gas-phase organic nitrates

In the presence of NO, the production rate of gas-phase oxidized organic nitrogen (gOON) from hydroxyl radical (OH)  
 95 initiated oxidation with volatile organic compounds (VOCs) ( $P_{\text{ON}}^{\text{OH}}$ ) can be calculated following Eq. (S5) (Liebmann et al., 2019):

$$P_{\text{ON}}^{\text{OH}} = [\text{OH}]\beta \sum \alpha_i^{\text{RO}_2} k_i^{\text{OH}} [\text{C}_i] \quad (\text{S5})$$

where  $[\text{OH}]$  is the concentration of OH, which was obtained from a box model simulation based on master chemical mechanism v3.3.1 (MCM v3.3.1) (Wang et al., 2020; Wolfe et al., 2016).  $[\text{C}_i]$  is the concentration of speciated VOC  $i$ .  $k_i^{\text{OH}}$  is the reaction rate coefficient between OH and VOC  $i$ ,  $\alpha_i^{\text{RO}_2}$  is the formation branching ratio of gOON for speciated VOC  $i$ ,  $\beta$  represents the fraction  
 100 of the peroxy radicals ( $\text{RO}_2$ ) that react with NO which can be estimated by  $\beta = \frac{k_{\text{RO}_2+\text{NO}}[\text{NO}]}{k_{\text{RO}_2+\text{NO}}[\text{NO}] + k_{\text{RO}_2+\text{HO}_2}[\text{HO}_2]}$  ( $k_{\text{RO}_2+\text{NO}} = 9.0 \times 10^{-12}$  and  $k_{\text{RO}_2+\text{HO}_2} = 2.3 \times 10^{-11} \text{ cm}^3 \text{ molecule}^{-1} \text{ s}^{-1}$  from MCM v3.3.1) (<http://mcm.leeds.ac.uk/MCMv3.3.1/home.htm>). The estimated values of  $\beta$  were 0.98–1.0 during the campaign, thus  $\beta = 1$  was used in this calculation. The VOC species, reaction rate coefficients, yields, and branching ratios used for this calculation can be found in Table 1.

The nitrate radical ( $\text{NO}_3$ ) concentration was calculated based on measured  $\text{N}_2\text{O}_5$  by the CIMS assuming temperature  
 105 equilibrium between these two species (Brown and Stutz, 2012). Then the gOON production rate from  $\text{NO}_3$  initiated oxidation of VOC ( $P_{\text{ON}}^{\text{NO}_3}$ ) can be calculated by Eq. (S6):

$$P_{\text{ON}}^{\text{NO}_3} = \sum \alpha_i k_{\text{NO}_3+\text{C}_i} [\text{C}_i] [\text{NO}_3] \quad (\text{S6})$$

where  $[C_i]$  and  $[NO_3]$  are the concentrations of speciated VOC  $i$  and  $NO_3$ ,  $\alpha_i$  is the gOON yield,  $k_{NO_3+[C_i]}$  is the reaction rate coefficient as shown in Table 1. The reactions between alkanes and  $NO_3$  are very slow accounting for negligible chemical changes in the ambient atmosphere so that alkanes were not included in this calculation. The VOC species of terpenes, aromatics, and alkenes (Table 1) measured during October 2018 were used to calculate the  $NO_3$  loss rate. Only 2% of the  $NO_3$  loss rate was attributed to alkenes. And the  $NO_3$  loss rate attributed to cresol and phenol (30% on average, ranging from 13% to 60%) was three orders of magnitude higher than the other aromatics ( $\sim 0.1\%$ ). Thus, we assumed that the alkanes, alkenes, and the other aromatics (excluding cresol and phenol) contributed little ( $<3\%$ ) to the total gOON production rate, which were not included in this calculation.

The gOON production rate of ozone ( $O_3$ ) initiated oxidation of VOC ( $P_{ON}^{O_3}$ ) can be calculated by Eq. (S7):

$$P_{ON}^{O_3} = [O_3] \beta \sum \alpha_i^{O_3} k_i^{O_3} [C_i] \alpha_i^{RO_2} \quad (S7)$$

where  $[O_3]$  is the concentration of  $O_3$ ,  $k_i^{O_3}$  is the reaction rate coefficient between  $O_3$  and VOC  $i$ ,  $\alpha_i^{O_3}$  is the yield of  $RO_2$ , and  $\alpha_i^{RO_2}$  is the ON yield of the reaction  $RO_2+NO$  for speciated VOC (Table 1).  $\beta$  and  $[C_i]$  are the same as in Eq. (S5). The short-chain alkenes including propene, butene and pentene yield negligible SOA as well as ON, thus we did not include them in the calculation.

Fig. S4 shows the time series and average diurnal variations of OH,  $NO_3$ , and  $O_3$  used in the calculation above. The average concentration of OH was  $1.11 \pm 1.86 \times 10^6$  molecule  $m^{-3}$  which peaks at noon (mean  $4.20 \pm 2.69 \times 10^6$  molecule  $m^{-3}$ ). The averaged mixing ratio of  $NO_3$  was  $1.14 \pm 2.82$  ppt which peaks at 18:00 ( $2.25 \pm 3.85$  ppt) and night ( $2.35 \pm 5.00$  ppt), consistent with other studies in urban areas (Hamilton et al., 2021; Wang et al., 2017). No speciated monoterpene measurement was conducted in this campaign. Thus, we assume that the monoterpenes at this urban site were contributed by limonene and  $\alpha$ -pinene with a ratio of 1:1 during this campaign. A recent study found that half of the ambient monoterpenes can be attributed to the VCP-dominated source based on measurements at altitude of 450 m in the Canton Tower in Guangzhou urban area (Li et al., 2022). The other half monoterpenes are mainly from visitor-related emissions since Canton tower is a tourism site. It is consistent with our finding that the ambient monoterpenes in this study is anthropogenic origins. Gkatzelis et al. (2021) found the limonene was the dominant isomer of monoterpenes in VCP emissions. And Coggon et al. (2021) found the  $\alpha$ -pinene (19%) and limonene (53%) were the main isomers of monoterpene in the center of megacity New York. Thus, a 1:1 assumption of limonene and  $\alpha$ -pinene applied here shall be reasonable. The concentration of sesquiterpenes could be calculated as a function of the monoterpene concentration, as described in Sommers et al. (2022). Since a large fraction of monoterpene in this study was assumed to be anthropogenic, thus, the calculated concentration of sesquiterpenes herein is a high limit. The calculated mass concentration of the sesquiterpenes is only 7% of the monoterpene concentration in this campaign. Omitting the sesquiterpenes in the gOON production rate calculation

should be within the estimated uncertainty of the gOON production rate. In addition, the yield parameters for gOON production rate from sesquiterpenes were missed. Thus, in this study, sesquiterpenes were not accounted for in the final gOON production rate calculation.

### Text S3: Uncertainty estimation.

140 **Uncertainty of gOON production rate estimation.** Monte Carlo method was used to estimate the entire uncertainty of the gOON production rate with 10,000 calculations as shown in Fig. S5. During the Monte Carlo method, the kinetic parameter sets were assigned according to Liebmann et al. (2019), which can involve the uncertainties of various parameters, e.g., yields and branch ratios. Then the parameters were allowed to randomly vary within the range and vast number of combinations of input parameters were used to be computed (McKay et al., 2000). During the iteration, we estimated the uncertainty in the term NO<sub>3</sub> pathway of  
 145 58%, with 50% from [NO<sub>3</sub>], 15% from  $k_{\text{NO}_3+\text{C}_i}$ , 50% from  $\alpha_i$ , and 30% from [C<sub>i</sub>]. If 30–50% uncertainties were added to the concentration ratio of  $\alpha$ -pinene to limonene, the uncertainty of the term NO<sub>3</sub> pathway increased up to 62–70%. The uncertainty in the term OH pathway was 45%, with 50% from [OH], 15% from  $k_i^{\text{OH}}$ , 50% from  $\alpha_i^{\text{RO}_2}$ , 30% from  $\beta$ , and 35% from [C<sub>i</sub>]. The uncertainty in the term O<sub>3</sub> pathway was 66%, with contribution of 10% from [O<sub>3</sub>], 35% from [C<sub>i</sub>], 15% from  $k_i^{\text{O}_3}$ , 50% from  $\alpha_i^{\text{RO}_2}$ , 30% from  $\beta$ , and 50% from  $\alpha_i^{\text{O}_3}$ . An overall uncertainty of 56% was estimated by this method.

150 **Uncertainty for the ratio of pOrgNO<sub>3</sub> measured by CIMS and AMS (pOrgNO<sub>3,CIMS</sub> vs pOrgNO<sub>3,AMS</sub>).** This uncertainty estimation was based on the Eq. (S8) below combined with error propagation law.

$$\frac{pOrgNO_{3,CIMS}}{pOrgNO_{3,AMS}} = \frac{pOON_{CIMS} \times \frac{MW_{[NO_3]}}{MW_{[pOON]}}}{pOrgNO_{3,AMS}} \quad (\text{S8})$$

The uncertainty of pOON<sub>CIMS</sub> was 47% according to the uncertainty of OON derived from the comparison of voltage scanning factors and calibration factors (Fig. S3), which was discussed in section 2.2.2 of the main text. The uncertainty of pOON molecular  
 155 weight (MW, 234 ± 7.9 g mol<sup>-1</sup>), which was obtained with CIMS measurement, was assigned to be 10%. The uncertainty of pOrgNO<sub>3,AMS</sub> was 30% that was regarded as a low limit due to the measurement uncertainty of AMS. For OON quantification, the uncertainty of the NO<sub>2</sub><sup>+</sup>/NO<sup>+</sup> ratio method was estimated using the lower and higher NO<sub>2</sub><sup>+</sup>/NO<sup>+</sup> ratio from ONs (0.18 and 0.09) based on Xu et al. (2015), which was calculated to be 27% as discussed in Text S1. Finally, the total uncertainty of the pOON ratio between CIMS and AMS was 63%. It suggests that the pOrgNO<sub>3,CIMS</sub> can explain 28 ± 18% of pOrgNO<sub>3,AMS</sub>.

160 **Uncertainty for the source apportionment of OON.** Based on the Eq. (1–2), the uncertainty of the source apportionment of OON was estimated by the Monte Carlo method with 10,000 calculations. The uncertainty of levoglucosan was 10% considering its standard calibration (Ye et al., 2021) and mass contribution (90 ± 2%) among isomers (referred to section 2.2.2). The uncertainty of the primary ratios of OON vs levoglucosan, ( $([OON_{\text{measured}}]/[levo.])_{bb}$ ), was considered equal to their average standard deviation shown in Table S1, i.e., 20% and 42% for pOON and gOON, respectively. The concentration uncertainties for OON<sub>bb</sub>

165 were calculated to be 19% and 37% for gas and particle phases, respectively. After performing the Monte Carlo method, the uncertainties of the OON<sub>bb</sub> fraction in total OON were around 9% and 11% for aerosol and gas phase, respectively. The standard deviations of averaged OON<sub>bb</sub> fraction in total OON from the entire campaign were around 22% and 23% for aerosol and gas phase, respectively. By combining the uncertainty from Monte Carlo and standard deviation due to averaging, the final contributions with uncertainties of biomass burning to pOON and gOON are  $49 \pm 23\%$  and  $24 \pm 25\%$ , respectively.

170 **Text S4: The calculation of aromaticity index and seasonal decomposition**

The aromaticity index (AI) is defined for the identification of aromatic and condensed aromatic structures, which was calculated by the Eq. (S9) (Koch and Dittmar, 2016, 2006):

$$AI = \frac{1+c-0.5o-0.5n-0.5h}{c-0.5o-n} \quad (S9)$$

where c, o, n, and h correspond to the number of C, O, N, and H atoms, respectively, in each molecule.

175 A time series usually comprises three components: a long-term trend, seasonal fluctuation, and a remainder component (containing anything else in the time series). A long-term trend is a tendency or state of affairs in which a phenomenon develops and changes continuously over a longer period of time. Seasonal fluctuation is the regular variation caused by seasonal change. The time series decomposition can distill the component of repeatability from complex data. This method is similar to the combination of two filters with large and small bandwidth. The bandwidth can be adjusted for different time resolution. If an additive decomposition was assumed, the Eq. is:

180

$$y_t = S_t + T_t + R_t \quad (S10)$$

where  $y_t$  is the data,  $S_t$  is the seasonal fluctuation,  $T_t$  is the long-term trend, and  $R_t$  is the remainder component, all at period  $t$ . Taking 24 hours as the “season” in the calculation, i.e., adjusting the “bandwidth”, we can get a clearer diurnal variation preventing the trend blurred by the varies intensity between days. The detailed process of the calculation applied in this paper can refer to Hilas et al. (2006).

185

**Table S1. The regression slopes between measured gOON (pOON) vs particle-phase levoglucosan in selected biomass burning emission episodes. The data used to derive these slopes are also shown in Figs. S12 and S13. The average values based on different biomass burning episodes are also shown.**

| Episode               | Slope<br>( $\mu\text{g m}^{-3}/\mu\text{g m}^{-3}$ ) | Episode | Slope<br>( $\mu\text{g m}^{-3}/\mu\text{g m}^{-3}$ ) |
|-----------------------|------------------------------------------------------|---------|------------------------------------------------------|
| <b>Gas phase</b>      |                                                      |         |                                                      |
| (06)                  | $5.30 \pm 2.10$                                      | (28)    | $3.57 \pm 0.72$                                      |
| (20)                  | $1.00 \pm 0.18^a$                                    | (30)    | $3.99 \pm 0.87$                                      |
| (22)                  | $4.10 \pm 1.54$                                      | Average | $3.95 \pm 1.67$                                      |
| (24)                  | $5.75 \pm 1.28$                                      |         |                                                      |
| <b>Particle phase</b> |                                                      |         |                                                      |
| (06)                  | $6.66 \pm 2.28$                                      | (25)    | $5.14 \pm 1.76$                                      |
| (07)                  | $3.14 \pm 1.05$                                      | (28)    | $5.61 \pm 0.69$                                      |
| (13)                  | $5.23 \pm 0.26$                                      | (30)    | $4.37 \pm 0.42$                                      |
| (20)                  | $5.11 \pm 0.40$                                      | Average | $5.05 \pm 1.01$                                      |
| (22)                  | $5.15 \pm 0.88$                                      |         |                                                      |

190 **Note.** <sup>a</sup> The relatively low value from the episode at night on 20 October was also selected for the criteria used here, indicating the special low contribution from biomass burning to gOON during this episode.



**Table S2. Summary of average mass concentrations of OON measured or calculated by the CIMS and the AMS, averaged values of gOON production rates, meteorological parameters, and other OON-related parameters during October 2018.**

|                                                                 | Average $\pm$ SD |                                             | Average $\pm$ SD  |
|-----------------------------------------------------------------|------------------|---------------------------------------------|-------------------|
| <b>pOrgNO<sub>3,AMS</sub> (<math>\mu\text{g m}^{-3}</math>)</b> | --               | secondary gOON ( $\mu\text{g m}^{-3}$ )     | 0.79 $\pm$ 0.67   |
| <i>NO<sub>2</sub><sup>+</sup>/NO<sup>+</sup></i>                | 0.60 $\pm$ 0.46  | <b>Total gOON</b>                           | 0.11 $\pm$ 0.11   |
| <i>ratio method</i>                                             |                  | <b>production rate (ppb h<sup>-1</sup>)</b> |                   |
| <i>TD method</i>                                                | 1.10 $\pm$ 0.81  | <i>OH initiated</i>                         | 0.07 $\pm$ 0.10   |
| <i>PMF method</i>                                               | 2.29 $\pm$ 2.38  | <i>NO<sub>3</sub> initiated</i>             | 0.05 $\pm$ 0.07   |
| pOON <sub>CIMS</sub> ( $\mu\text{g m}^{-3}$ )                   | 0.66 $\pm$ 0.53  | <i>O<sub>3</sub> initiated</i>              | 0.01 $\pm$ 0.01   |
| gOON <sub>CIMS</sub> ( $\mu\text{g m}^{-3}$ )                   | 1.00 $\pm$ 0.67  | OA ( $\mu\text{g m}^{-3}$ )                 | 14.27 $\pm$ 8.20  |
| pC <sub>4-5</sub> N ( $\mu\text{g m}^{-3}$ )                    | 0.10 $\pm$ 0.07  | Nitrate ( $\mu\text{g m}^{-3}$ )            | 4.44 $\pm$ 6.05   |
| pC <sub>6-9_aro</sub> N ( $\mu\text{g m}^{-3}$ )                | 0.10 $\pm$ 0.09  | pOON <sub>CIMS</sub> /OA                    | 0.05 $\pm$ 0.02   |
| pC <sub>8-10</sub> N ( $\mu\text{g m}^{-3}$ )                   | 0.27 $\pm$ 0.21  | NO (ppb)                                    | 9.24 $\pm$ 18.33  |
| pC <sub>11-20</sub> N ( $\mu\text{g m}^{-3}$ )                  | 0.09 $\pm$ 0.08  | NO <sub>2</sub> (ppb)                       | 31.17 $\pm$ 18.38 |
| pC <sub>other</sub> N ( $\mu\text{g m}^{-3}$ )                  | 0.12 $\pm$ 0.09  | O <sub>3</sub> (ppb)                        | 36.95 $\pm$ 31.21 |
| levoglucosan ( $\mu\text{g m}^{-3}$ )                           | 0.06 $\pm$ 0.07  | wind speed (m s <sup>-1</sup> )             | 4.50 $\pm$ 2.18   |
| BB pOON ( $\mu\text{g m}^{-3}$ )                                | 0.32 $\pm$ 0.36  | temperature (°C)                            | 23.73 $\pm$ 2.92  |
| secondary pOON ( $\mu\text{g m}^{-3}$ )                         | 0.34 $\pm$ 0.35  | RH (%)                                      | 71.92 $\pm$ 17.43 |
| BB gOON ( $\mu\text{g m}^{-3}$ )                                | 0.25 $\pm$ 0.29  |                                             |                   |

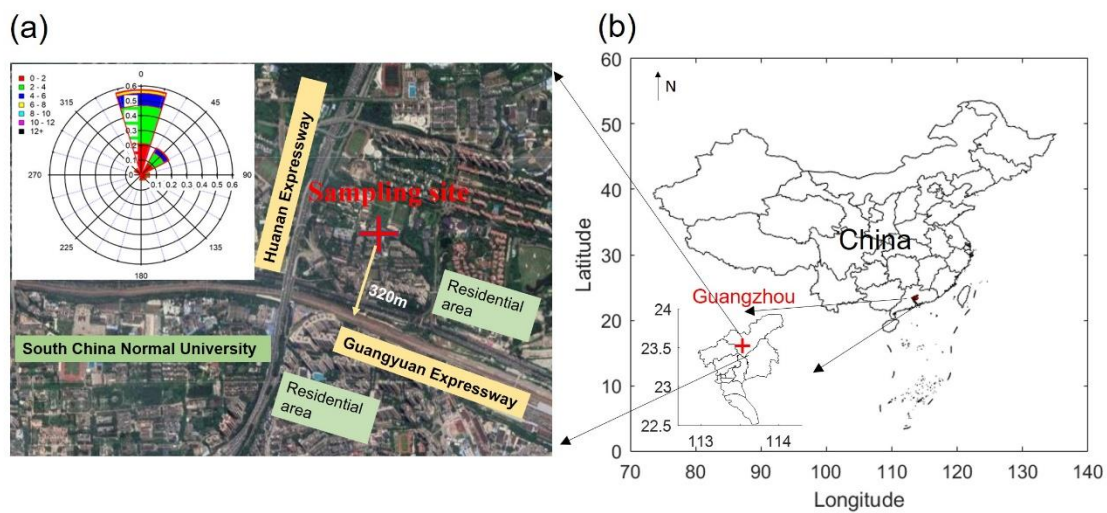

Figure S1. Site descriptions: (a) The satellite view of sampling site in Guangzhou, China. The sampling site is located in the campus of Guangzhou institute of Geochemistry (GIG), Chinese Academy of Sciences (CAS). The wind rose plot during the campaign is also shown as insert plot with color represents the wind speed. (b) The location of Guangzhou city in the map of China.

200

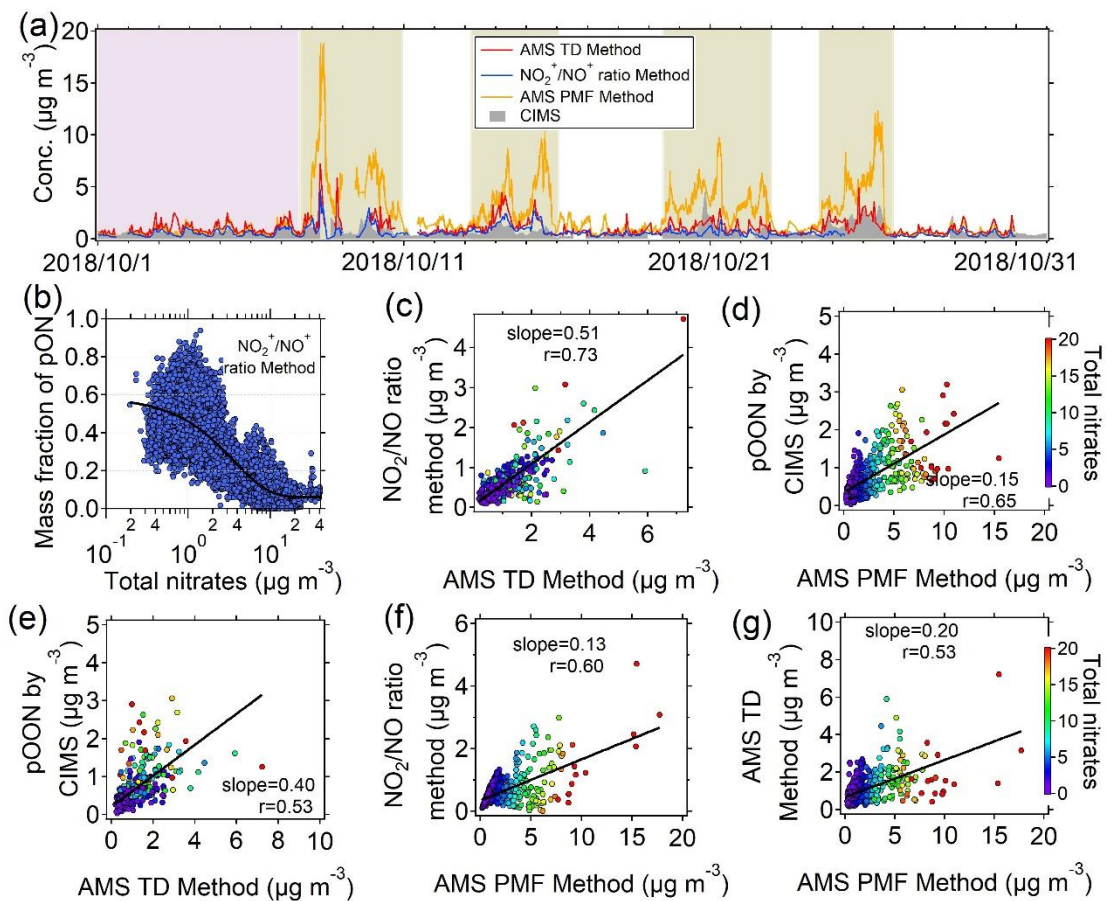

205 **Figure S2.** (a) Comparison of time series of pOON derived from the CIMS and pOrgNO<sub>3,AMS</sub> from the AMS based on three methods introduced in Text S1. The tinted backgrounds with light pink and light yellow indicate the period with low and high concentrations of nitrates, respectively. (b) Mass fraction of pOrgNO<sub>3,AMS</sub> (NO<sub>2</sub><sup>+</sup>/NO<sup>+</sup> ratio method) to total nitrates as a function of total nitrate signal derived from the AMS. (c–g) Scatterplots of pOON measured by the CIMS and pOrgNO<sub>3,AMS</sub> calculated by three methods based on the AMS measurement. All the scatters are color-coded by the mass concentration of total nitrate signals measured by the AMS. All the linear fitting are based on the orthogonal distance regression (ODR) algorithm in this study.

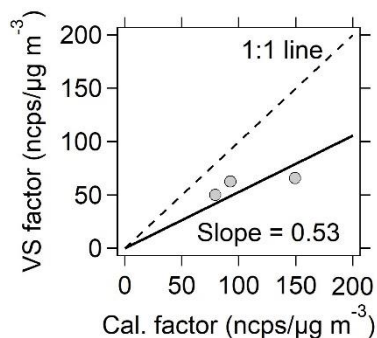

210 **Figure S3.** The scatterplot of calibration factors of three nitro-containing compounds (4-nitrophenol, 2,4-dinitrophenol, and 4-nitrocatechol) that derived from voltage scanning method and standard calibration. Based on the slope, 47% was regarded as the uncertainty of the voltage scanning method for OON calibration in this study. The detailed data can be found in the excel file of the supplement zip package of Ye et al. (2021).

215

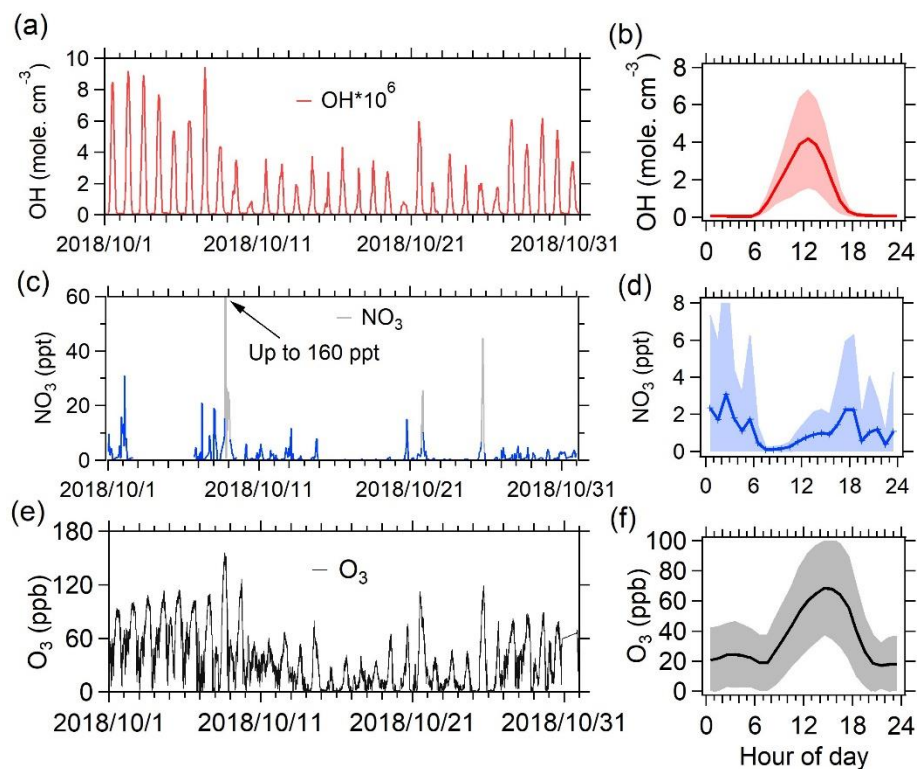

**Figure S4.** The time series and average diurnal variations of (a, b) OH, (c, d) NO<sub>3</sub> and (e, f) O<sub>3</sub> used in the calculation of the gOON production rate. The shaded areas mean the standard deviations. Based on the on-line measurement of N<sub>2</sub>O<sub>5</sub> by the CIMS, extremely high concentration of NO<sub>3</sub> was estimated, which cannot be explained by the box model. To avoid the interferences from extremely high concentration of NO<sub>3</sub>, the unexplained peaks color-coded using grey in (c) was not included in the final ON calculation. When such high episodes of measured NO<sub>3</sub> were included in the calculation of gOON production rate, the contribution of gOON production rate from daytime NO<sub>3</sub> oxidation is even larger.

220

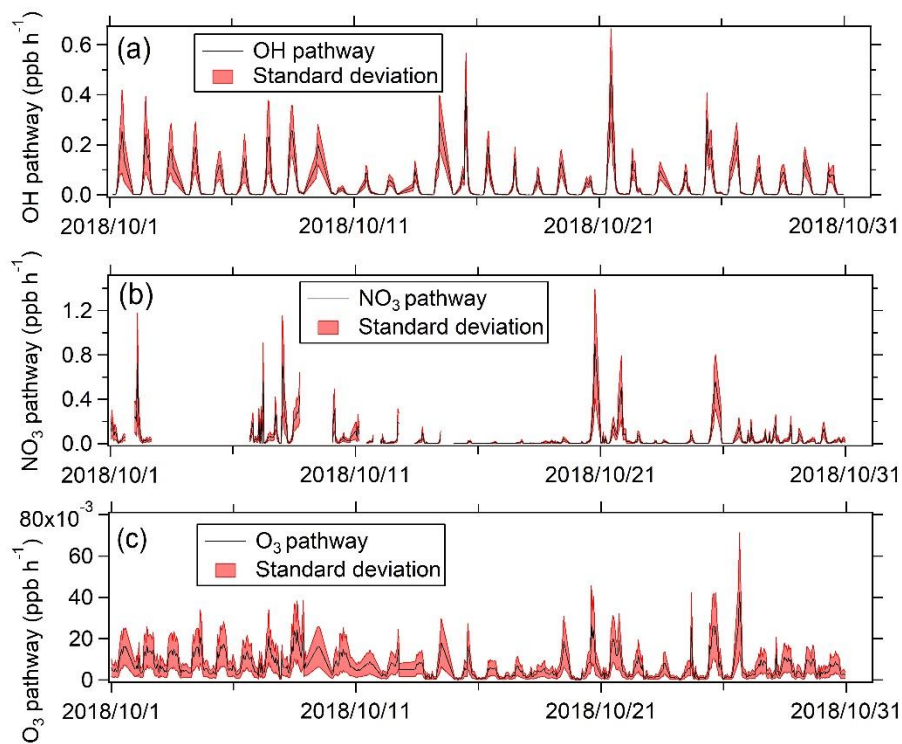

225

**Figure S5. The uncertainty of gOON production rate of (a) OH, (b) NO<sub>3</sub> and (c) O<sub>3</sub> pathway by Monte Carlo method with 10,000 calculations. The shaded areas mean the standard deviations.**

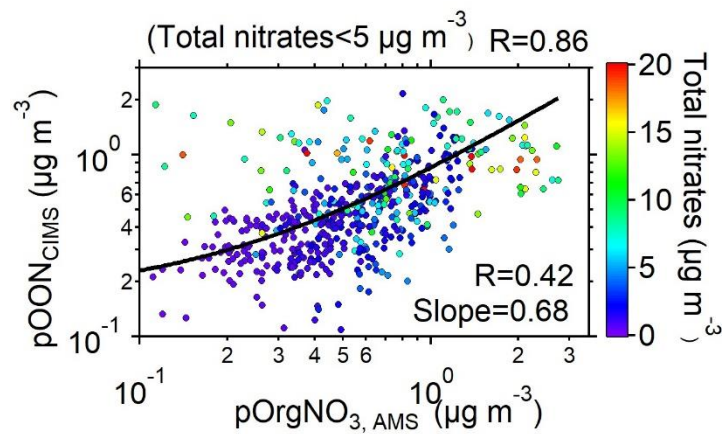

230

**Figure S6. Scatterplot of  $\text{pOON}_{\text{CIMS}}$  versus  $\text{pOrgNO}_{3,\text{AMS}}$  during the campaign. The points are color-coded using total nitrates (including inorganic nitrate and organic nitrate) measured by AMS.**

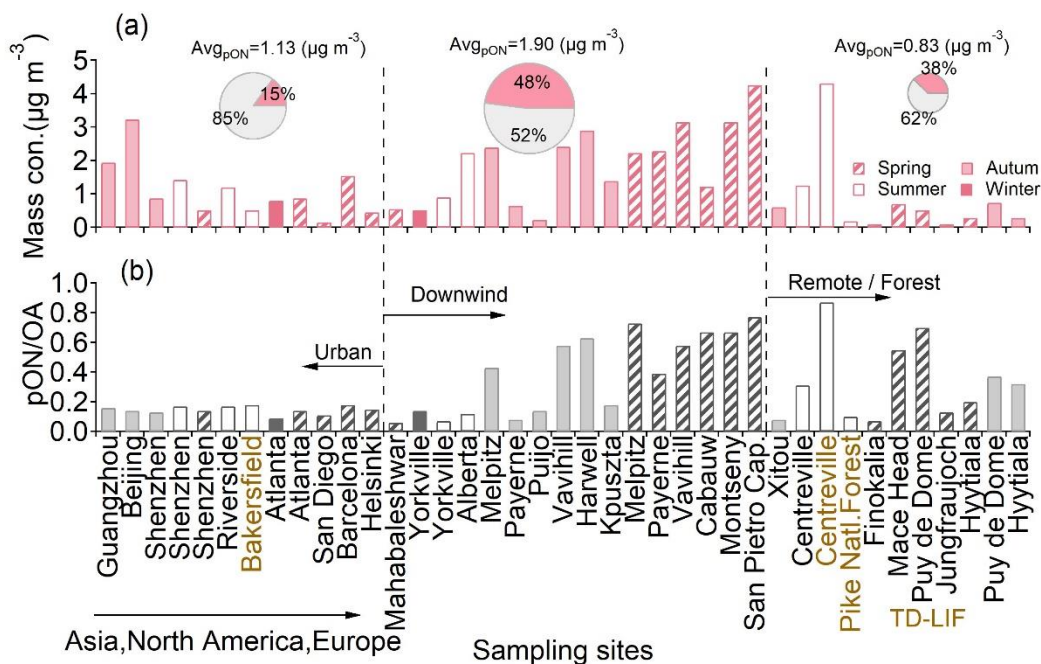

235 **Figure S7. (a) Mass concentration pON and (b) its fraction to OA at sites around the world (Ayres et al., 2015; Chen et al.,**  
**2020; Day et al., 2010; Farmer et al., 2010; Fisher et al., 2016; Fry et al., 2013; Kiendler-Scharr et al., 2016; Lanz et al.,**  
**2010; Lee et al., 2019; Rollins et al., 2012; Salvador et al., 2020; Singla et al., 2019; Xu et al., 2015; Yu et al., 2019) classified**  
**into urban sites, downwind sites (lied downwind of the cities where were influenced by the emissions from the cities), forest**  
**or remote sites with different seasons. The average molecular weight of OON used for all sites is assumed to be  $200 \text{ g mol}^{-1}$ .**  
 240 **The inset pies indicate the average fraction of pON (pink) to OA at each type of site. The yellow indicates the data are**  
**measured by thermal dissociation laser-induced fluorescence instrument (TD-LIF). The method of the  $p_{\text{ON}}_{\text{AMS/TD-LIF}}/\text{OA}$**   
**calculation was referred to Takeuchi and Ng (2019).**

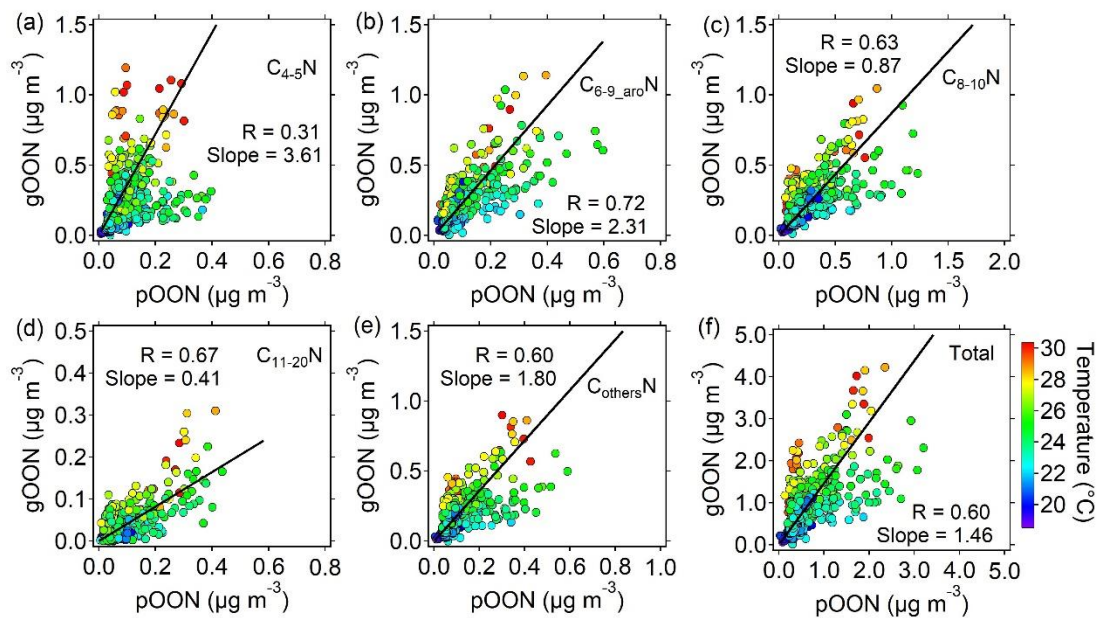

245 **Figure S8. Scatter plots between gOON and pOON in different categories, i.e., (a)  $C_{4-5}N$ , (b)  $C_{6-9\_aro}N$ , (c)  $C_{8-10}N$ , (d)  $C_{11-20}N$ , (e)  $C_{other}N$  and (f) the total values. The plots are color-coded by ambient temperature.**



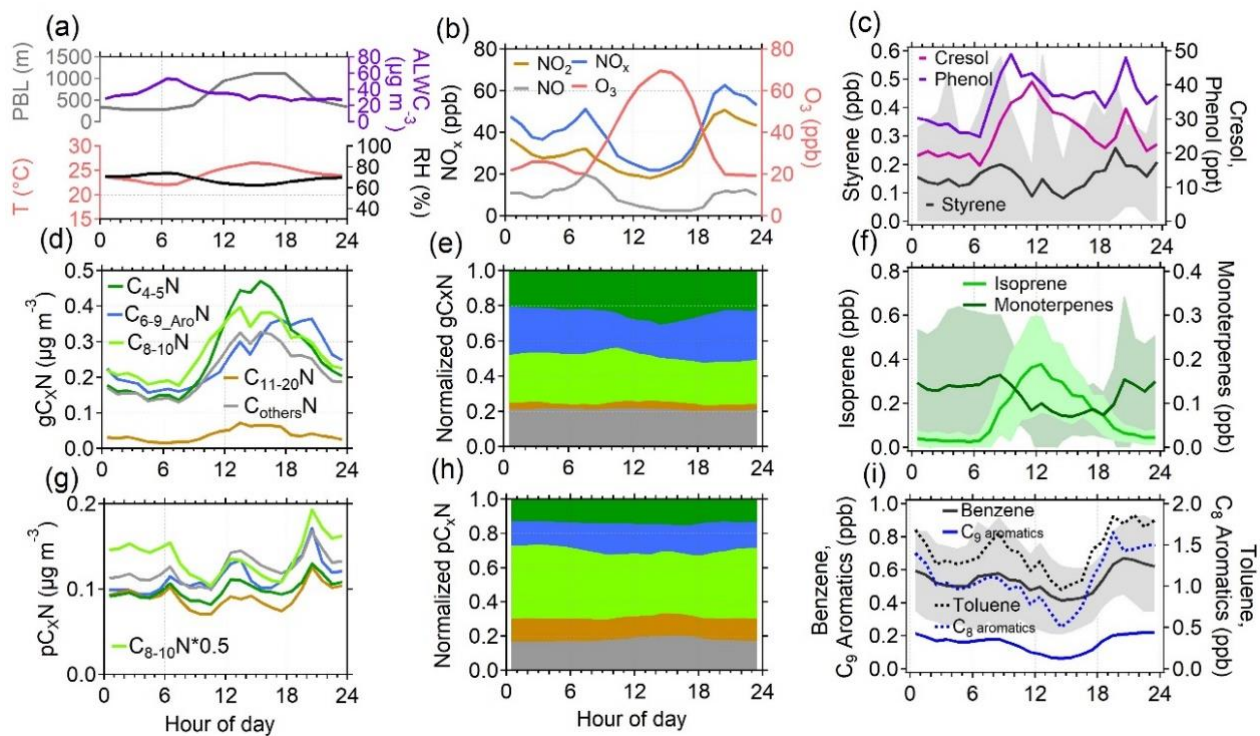

**Figure S9.** The average diurnal variations of (a) planetary boundary layer height (PBL), aerosol liquid water contents (ALWC), temperature (T) and relative humidity (RH), (b) mixing ratios of nitrogen dioxide ( $\text{NO}_2$ ), nitric oxide (NO),  $\text{NO}_x$  ( $\text{NO}_x = \text{NO} + \text{NO}_2$ ), and ozone ( $\text{O}_3$ ), (c) cresol, phenol, and styrene, (d) gas phase, and (g) particle phase  $\text{C}_x\text{N}$  groups measured by the CIMS, mass fraction of (e) gas- and (h) particle-phase  $\text{C}_x\text{N}$  groups, (f) isoprene and monoterpenes, (i) benzene, toluene,  $\text{C}_8$  aromatics,  $\text{C}_9$  aromatics during the campaign of October. The shaded areas mean the standard deviations.

250

255

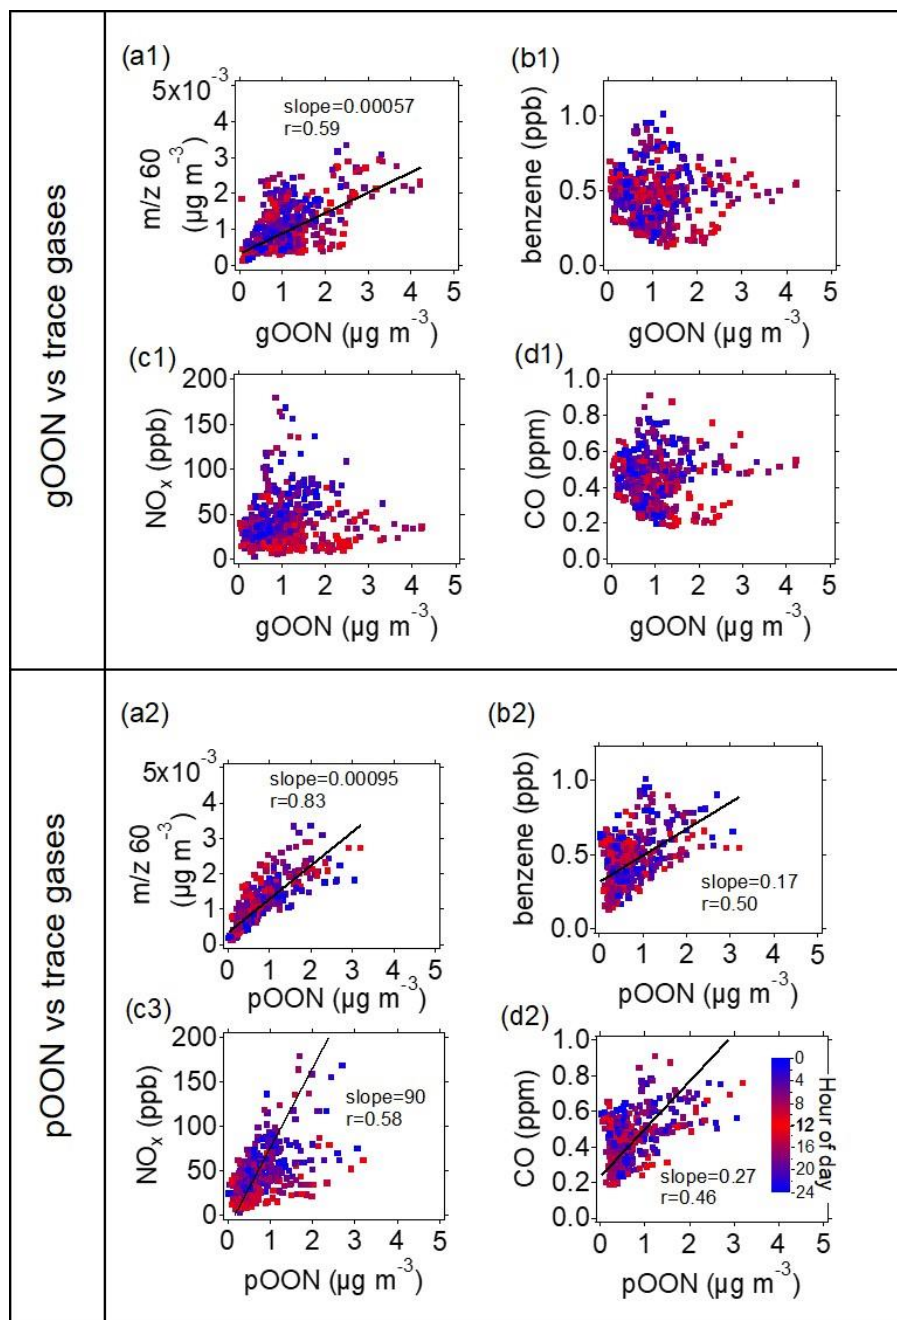

Figure S10. Scatter plots between gOON (up panel) or pOON (down panel) measured by the CIMS and (a1, a2)  $m/z$  60 fragment, (b1, b2) benzene, (c1, c2) NO<sub>x</sub>, (d1, d2) carbon monoxide (CO). All scatter plots are color-coded using hour of the day. The HR peak, C<sub>2</sub>H<sub>4</sub>O<sub>2</sub><sup>+</sup>, representing the levoglucosan, show similar variation as  $m/z$  60.

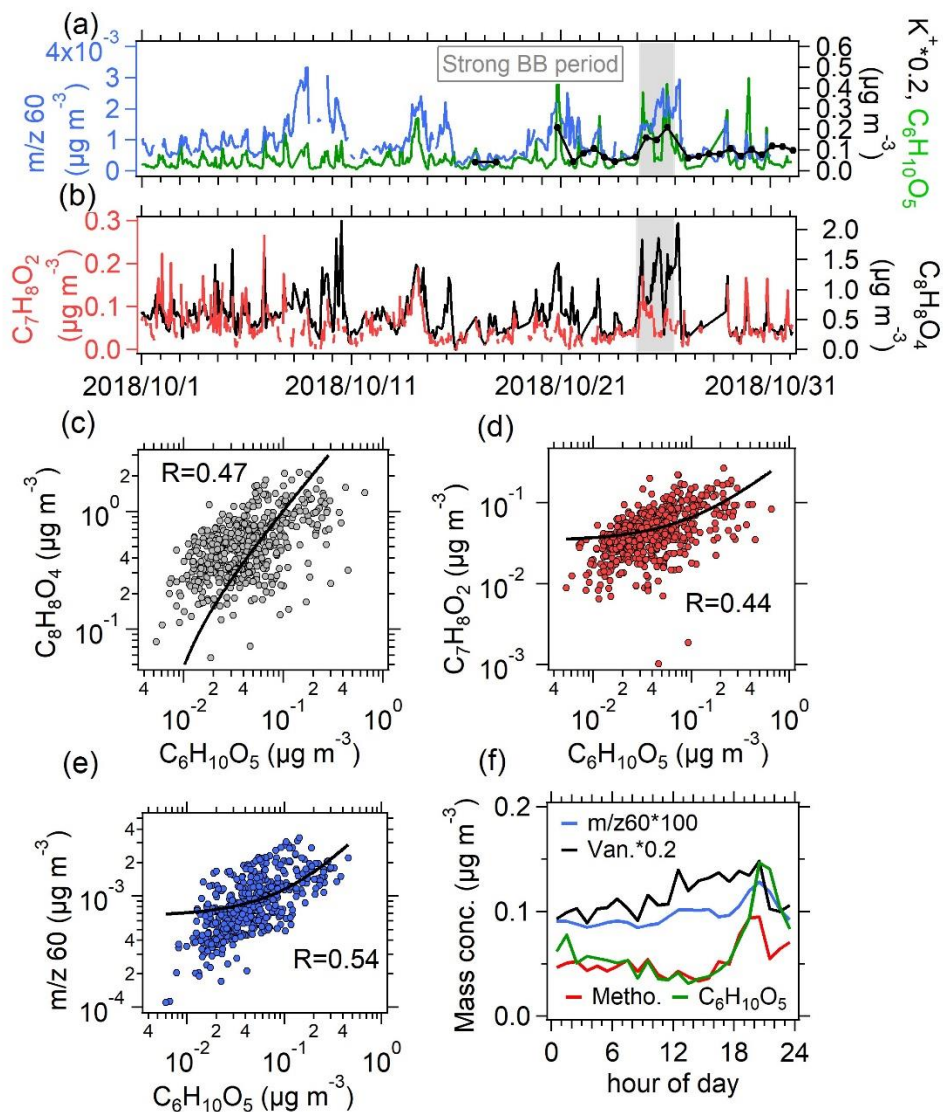

Figure S11. (a) Time series of  $m/z$  60 from the AMS, particulate  $C_6H_{10}O_5$  (levoglucosan and its isomers), water-soluble potassium ( $K^+$ ), (b)  $C_7H_8O_2$  (methoxyphenol and its isomers) and  $C_8H_8O_4$  (vanillic acid and its isomers) from CIMS. The  $m/z$  60 was found to be a fragment from levoglucosan-like species and supposed to be a tracer of biomass burning (Cubison et al., 2011). Scatter plots of (c)  $C_7H_8O_2$  (methoxyphenol and its isomers), (d)  $C_8H_8O_4$  (vanillic acid and its isomers), and (e)  $m/z$  60 versus levoglucosan. Moderate agreement between them and  $C_6H_{10}O_5$  also demonstrates the existence of biomass burning emissions (Urban et al., 2012). (f) Diurnal variation of the four species.

265

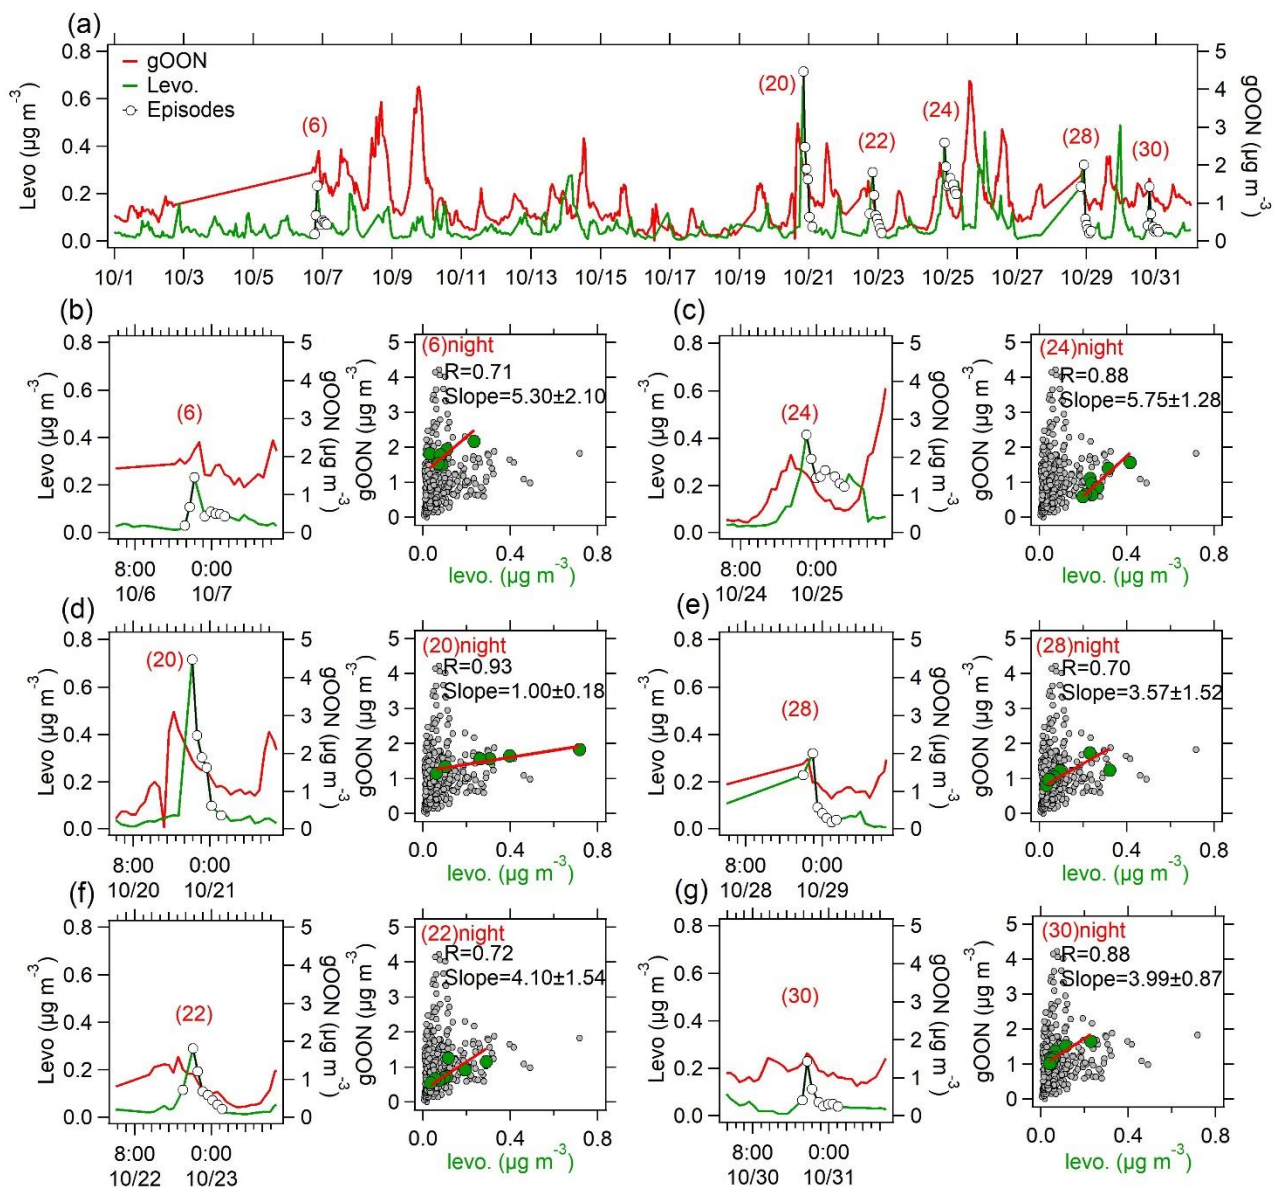

Figure S12. (a) Time series of measured gOON and levoglucosan (levo., particle-phase  $\text{C}_6\text{H}_{10}\text{O}_5$ ) measured by the CIMS. The biomass burning episodes are labeled based on selection criteria as well. (b–f) Six episodes were selected and used for calculating biomass burning ratios between gOON and levoglucosan. The time series and scatter plots during each episode are also shown here.

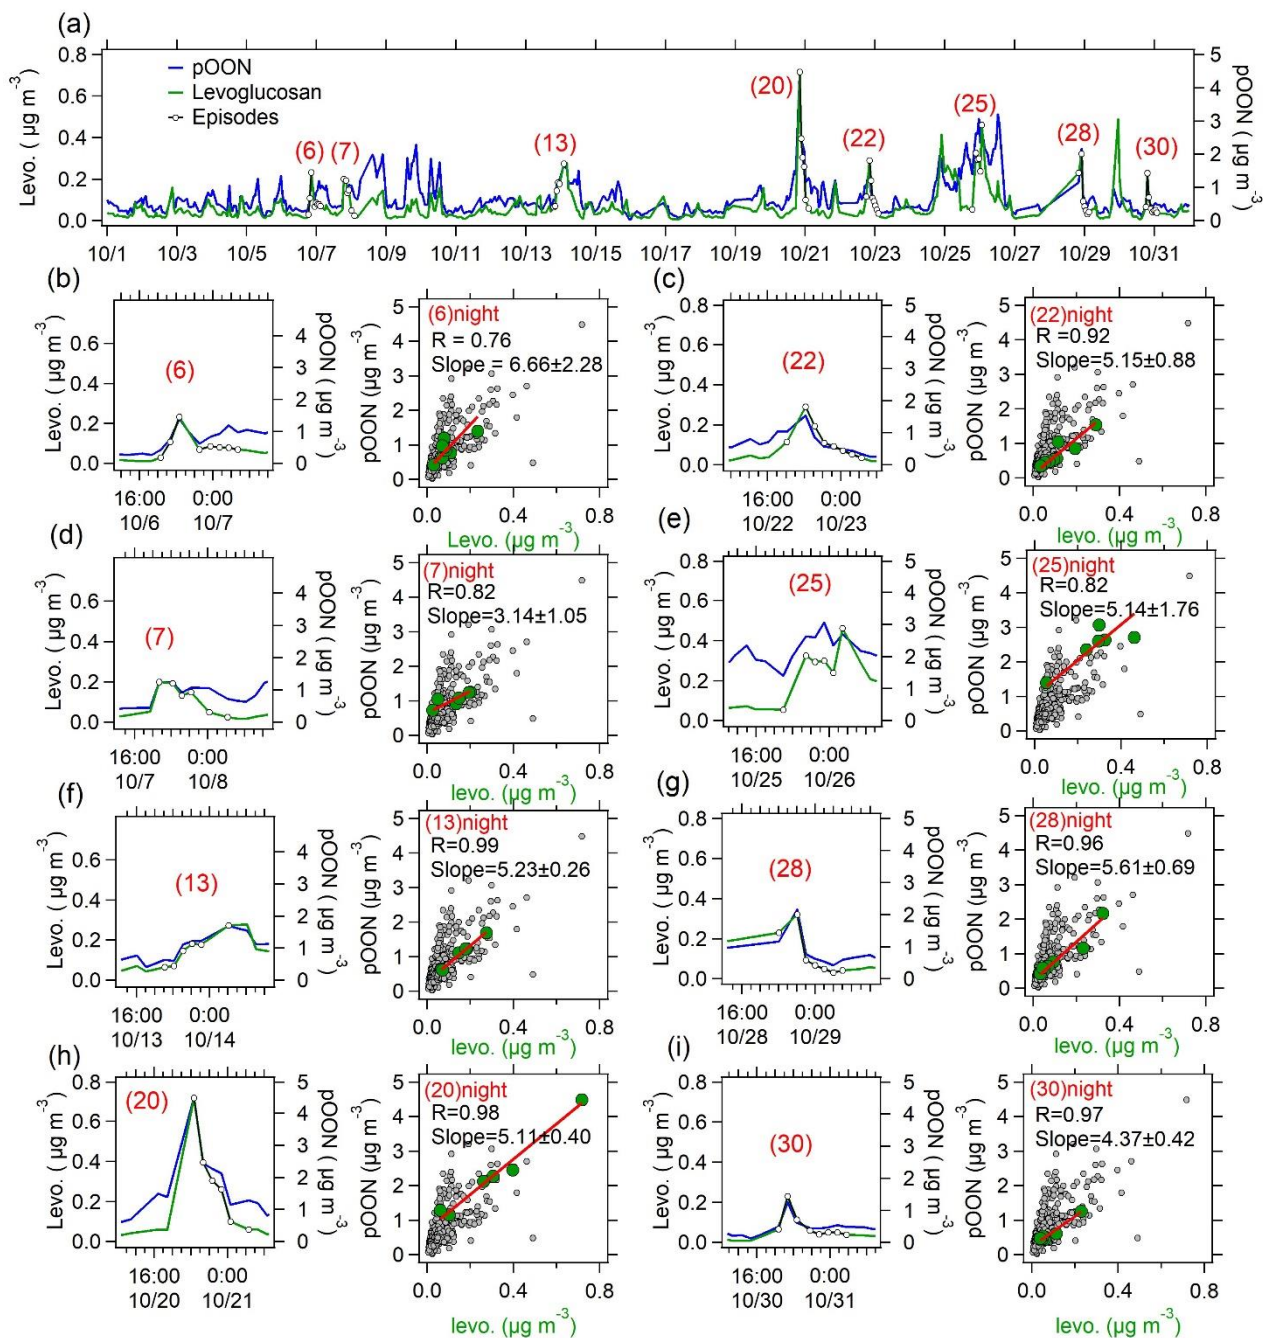

Figure S13. (a) Time series of pOON and levoglucosan (levo.) measured by the CIMS. The biomass burning episodes are labeled based on the selection criteria as well. (b–i) Eight episodes were selected and used for calculating biomass burning ratios between pOON and levoglucosan. The time series and scatter plots during each episode are shown here.

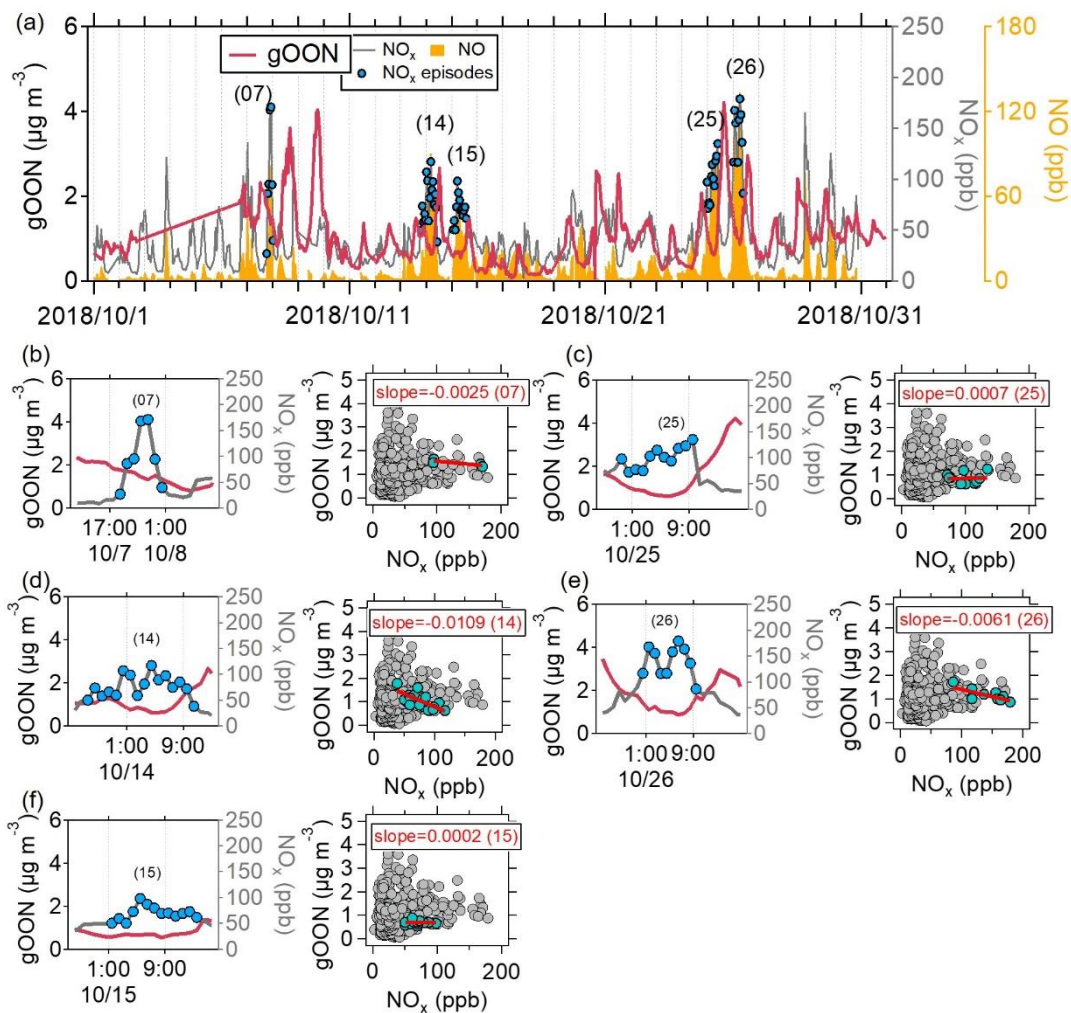

280 **Figure S14. (a)** Time series of gOON measured by the CIMS, and NO/NO<sub>x</sub> measured by a NO<sub>x</sub> analyzer. The episodes are  
 285 labeled based on the high concentration of NO<sub>x</sub>. (b–f) Time series and scatter plots of gOON vs NO<sub>x</sub> during five selected  
 NO<sub>x</sub> polluted episodes. NO<sub>x</sub> was the tracer for vehicle emissions (Harrison et al., 2003; Krecl et al., 2017). The extremely  
 high NO concentrations (100–200 ppb) indicate strong influences from fresh vehicle emissions. No consistent enhancement  
 between gOON and NO<sub>x</sub> was found during the high NO<sub>x</sub> episodes, suggesting the vehicle emission is not an important  
 source of gOON in the ambient air.

285

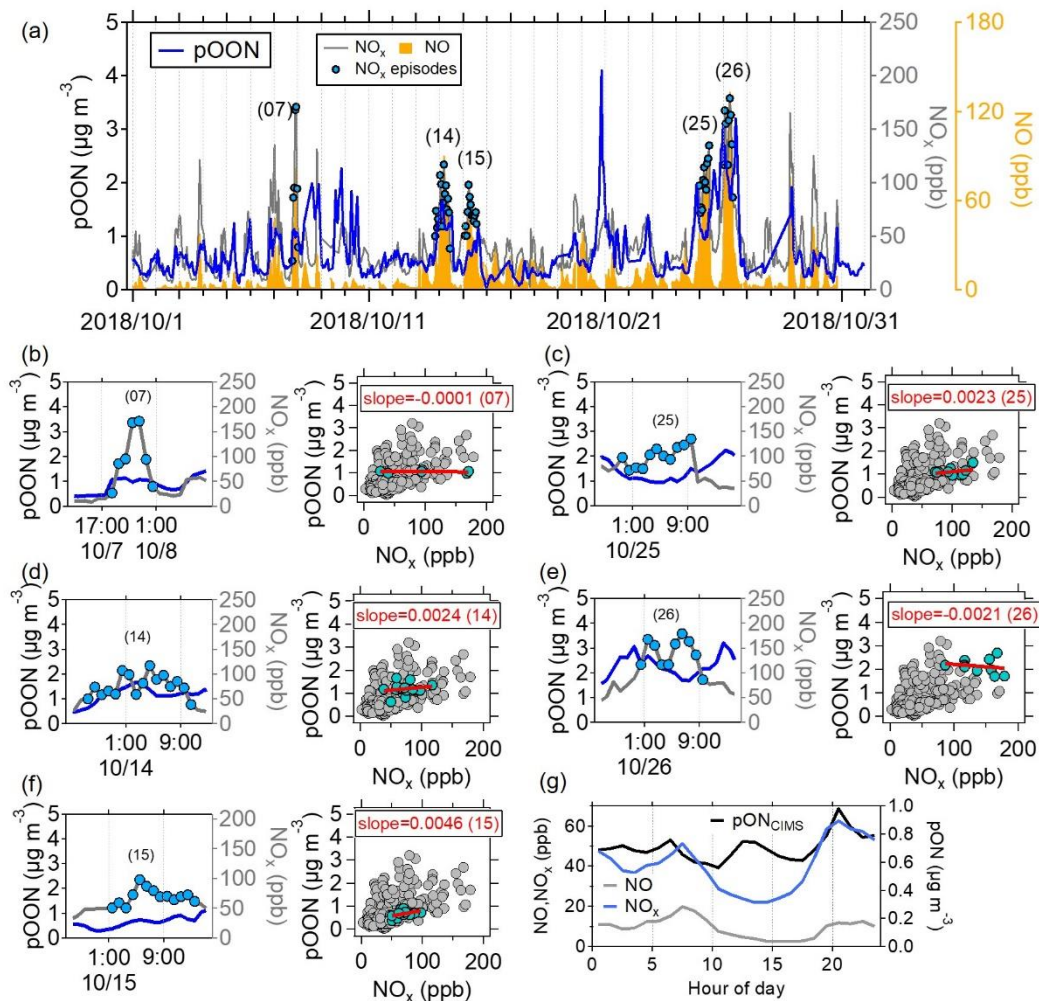

Figure S15. (a) Time series of pOON measured by the CIMS, and NO/NO<sub>x</sub> measured by the NO<sub>x</sub> analyzer. The episodes are labeled based on the high concentration of NO<sub>x</sub>. (b–f) Time series and scatter plots of pOON vs NO<sub>x</sub> during five selected NO<sub>x</sub> polluted episodes. (g) Diurnal variations of the measured pOON by the CIMS (pOON<sub>CIMS</sub>), NO and NO<sub>x</sub>. NO<sub>x</sub> was the tracer for vehicle emissions (Harrison et al., 2003; Krecl et al., 2017). The extremely high NO concentrations (100–200 ppb) indicate strong influence from fresh vehicle emissions during that episode. However, no consistent enhancement between pOON and NO<sub>x</sub> was found during these high NO<sub>x</sub> episodes, suggesting the vehicle emission is not an important source of pOON in this study.

290

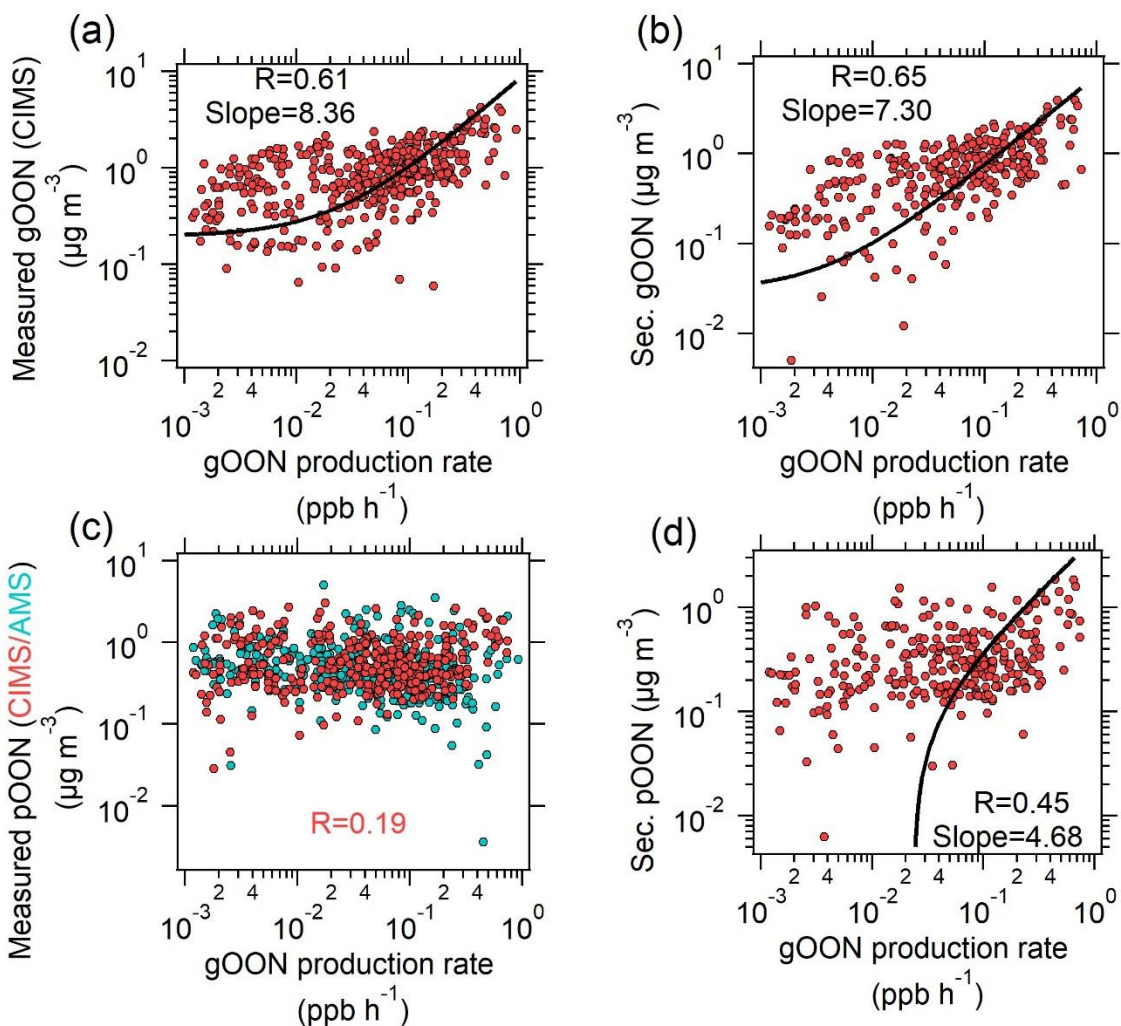

295

**Figure S16.** Scatter plots between (a) measured gOON and (b) secondary gOON vs total secondary gOON production rate. Scatter plots of (c) measured pOON and (d) secondary pOON vs total secondary gOON production rate. The logarithm is applied for both axes.

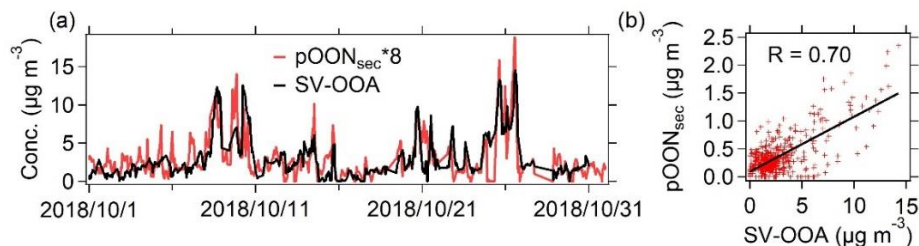

300

**Figure S17.** (a) The time series of pOON<sub>sec</sub> and semi-volatile oxygenated OA (SV-OOA) and (b) their scatterplot. The SV-OOA was treated as freshly formed secondary organic aerosol, which show good correlation with gas-phase oxidation product pentanones. The detailed information of SV-OOA can be found in Chen et al. (2021).



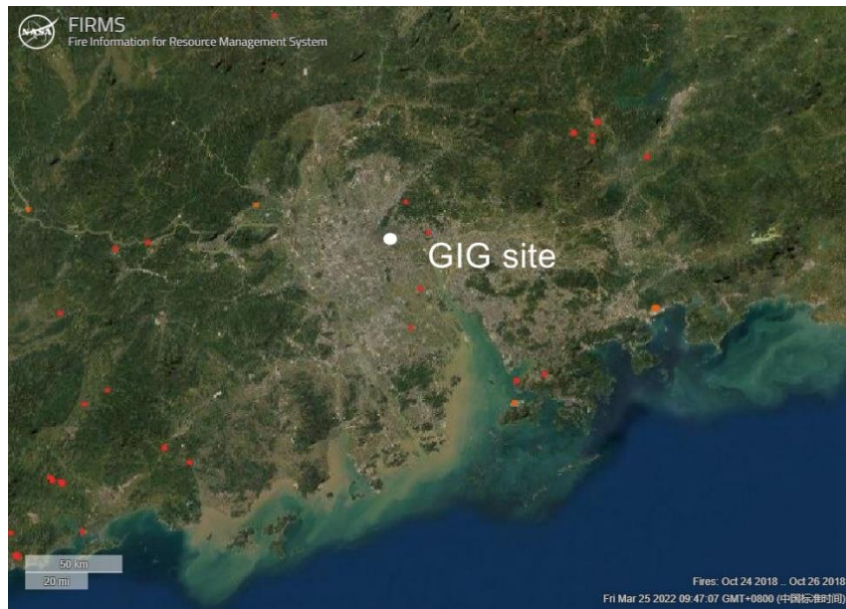

305 **Figure S18.** The field points of active fires or thermal anomalies from Modis Satellite around the sampling site, Guangzhou Institute of Geochemistry (GIG), in Guangzhou during the strong biomass burning period October 24–26<sup>th</sup>.

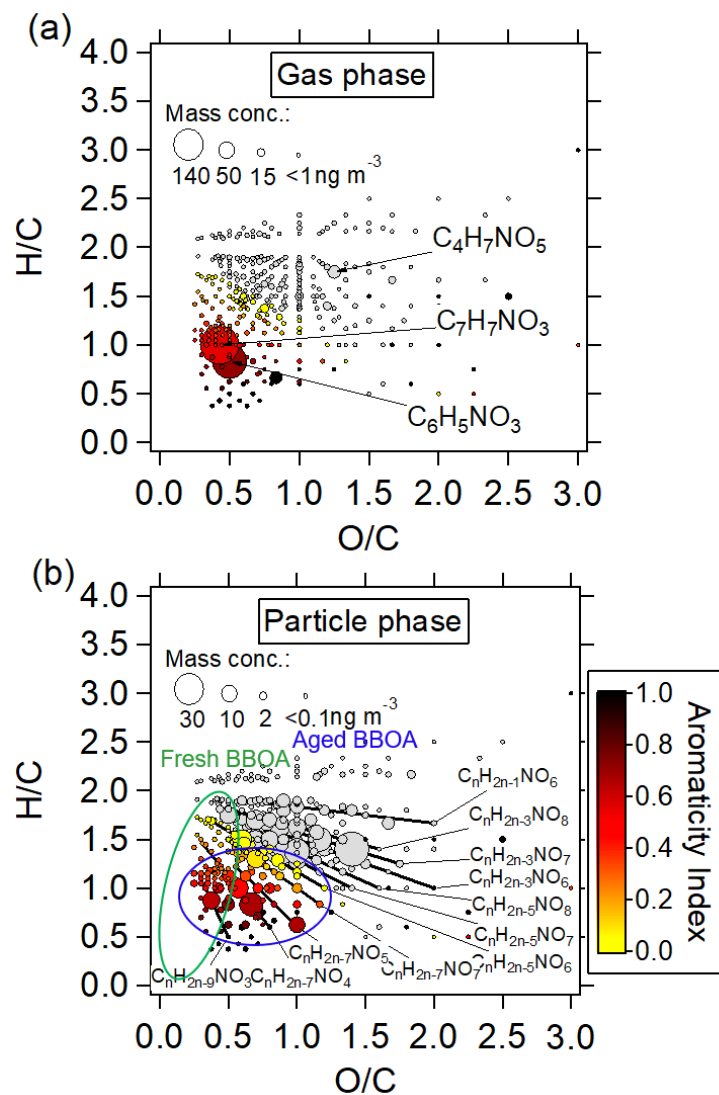

Figure S19. Van Krevelen (VK) diagram of all compounds from (a) gOON and (b) pOON. The size of symbols is proportional to the mean enhanced concentrations at 20:00 on October 22 of each compound. Ions are color-coded with Aromaticity Index between 0 and 1 (Wang et al., 2019). The green and blue ellipse represent OA from freshly emitted and aged biomass burning plumes, respectively, based on orbitrap (ESI<sup>-</sup>) measurement in Wang et al. (2019). During the whole campaign, the most contributive species are C<sub>4</sub>H<sub>7</sub>NO<sub>5</sub> (7.9%), C<sub>6</sub>H<sub>5</sub>NO<sub>3</sub> (7.4%) and C<sub>7</sub>H<sub>7</sub>NO<sub>3</sub> (5.9%) in the gas phase and C<sub>8</sub>H<sub>11</sub>NO<sub>7</sub> (7.9%) in the particle phase. The enhancement concentration of C<sub>4</sub>H<sub>7</sub>NO<sub>5</sub> is much lower than its mean value, implying secondary formation is its dominant source.

310

315

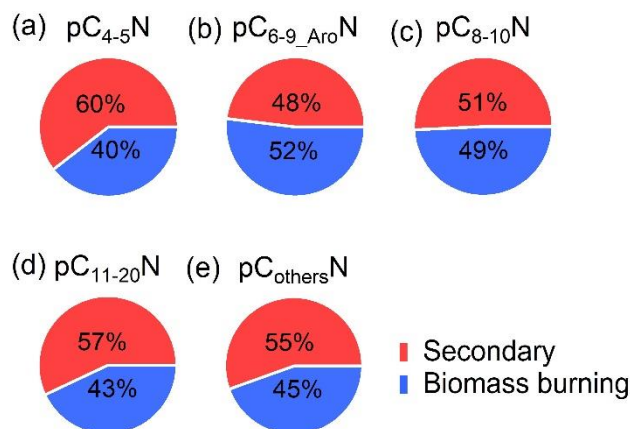

Figure S20. The contributions of biomass burning and secondary formation to each particle-phase C<sub>x</sub>N (pC<sub>x</sub>N) group following Eqs. (1) and (2) in section 3.2.

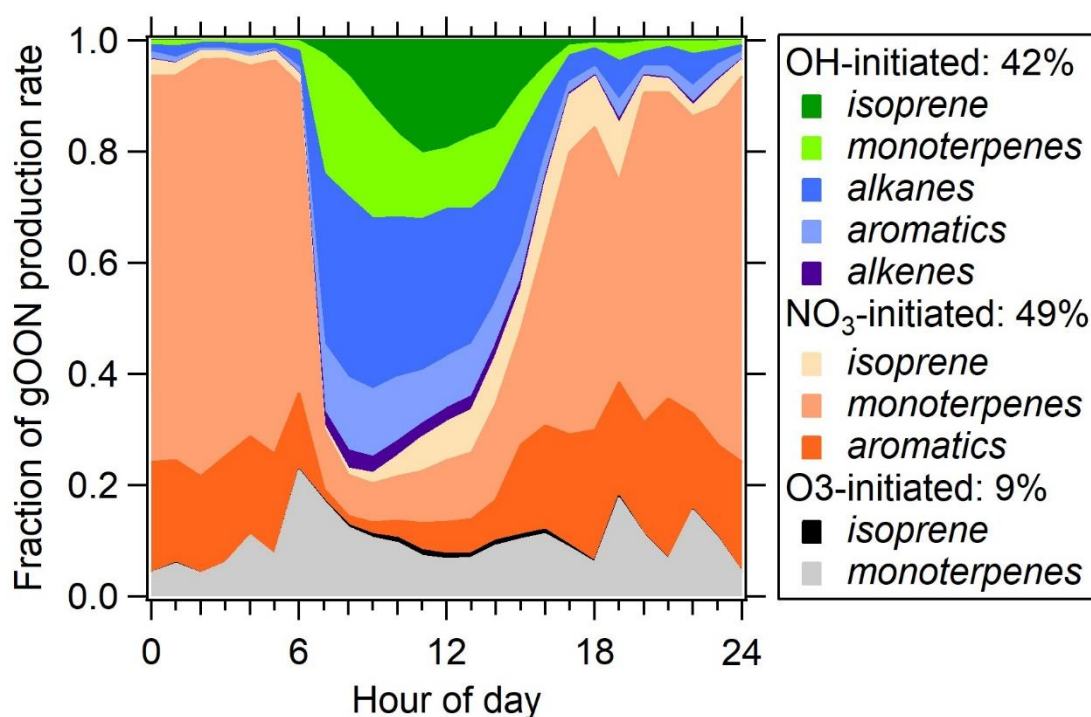

320 Figure S21. Average diurnal variations of the fractions of gOON production rate from OH initiated, NO<sub>3</sub> initiated and O<sub>3</sub> initiated oxidation pathways. For each pathway, contributions from classified VOCs are also shown.

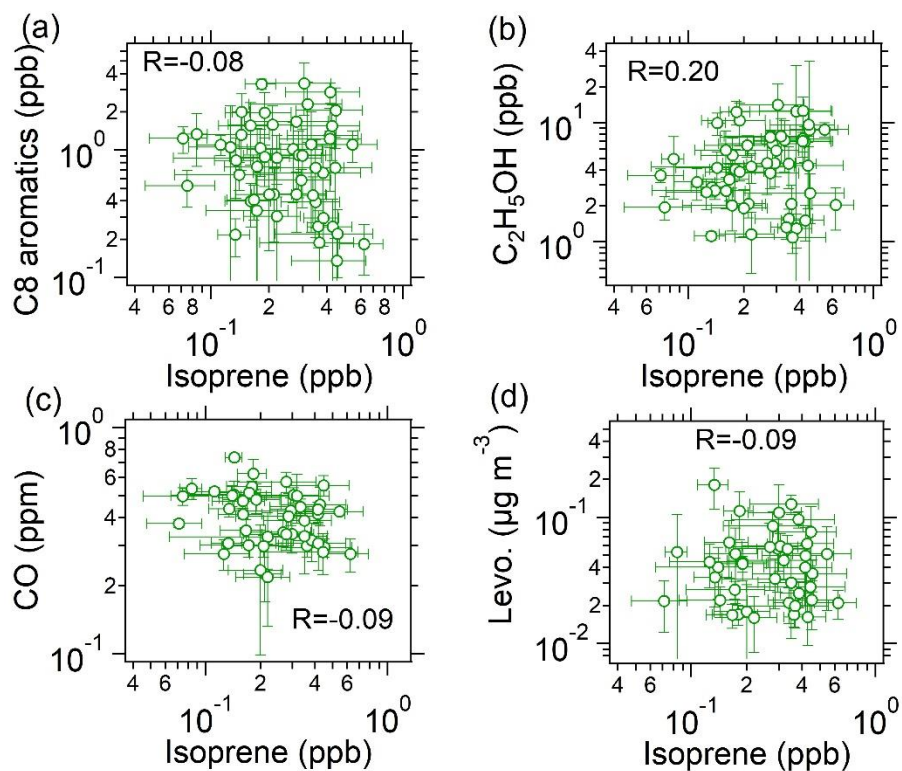

325

**Figure S22.** Scatter plots between the averaged (a) C8 aromatics, (b) ethanol, (c) CO, and (d) levoglucosan vs isoprene during daytime (9:00–18:00) during the entire campaign. The error bars are standard deviations of average values during daytime. The logarithm is applied for both axes.

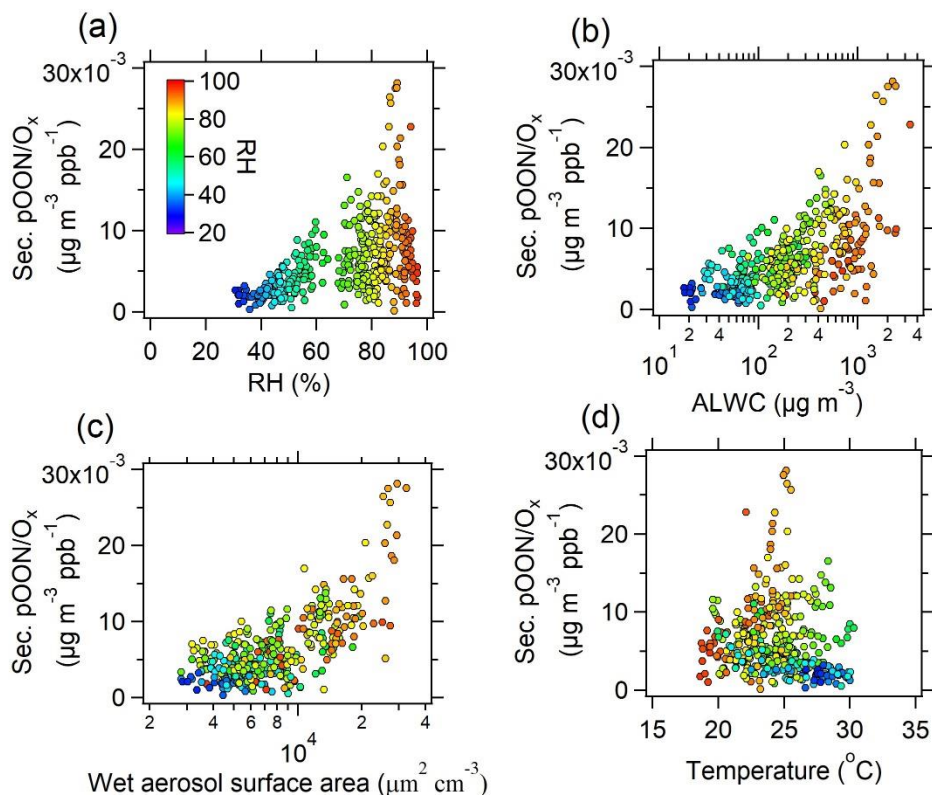

330 **Figure S23.** The ratio of Secondary (Sec.) pOON to  $O_x$  versus the (a) RH, (b) aerosol liquid water content (ALWC), (c) wet  
 335 aerosol surface area, and (d) ambient temperature color-coded using the RH during the campaign. Regression slopes  
 between pOON and  $O_x$  in photochemically processed urban emissions provide a metric to investigate the relative efficiency  
 of pOON versus  $O_3$  formation during photochemical oxidation (Wood et al., 2010; Hayes et al., 2013). The different values  
 of secondary pOON/ $O_x$  ratio can be attributed to photochemical oxidation from different VOC constituent (Nault et al.,  
 2021), heterogenous/aqueous reaction (Zhang et al., 2018; Zhan et al., 2021; Xu et al., 2017; Dai et al., 2019; Hu et al., 2016),  
 and mixing with air aloft that contains residual pOON and  $O_x$  during boundary layer growth (Wood et al., 2010). The  
 secondary pOON/ $O_x$  ratios that positive correlated with ALWC and wet aerosol surface area suggested that partial pOON  
 might be formed by heterogenous/aqueous reaction, which can efficiently produce secondary pOON but inefficiently on  $O_x$ .

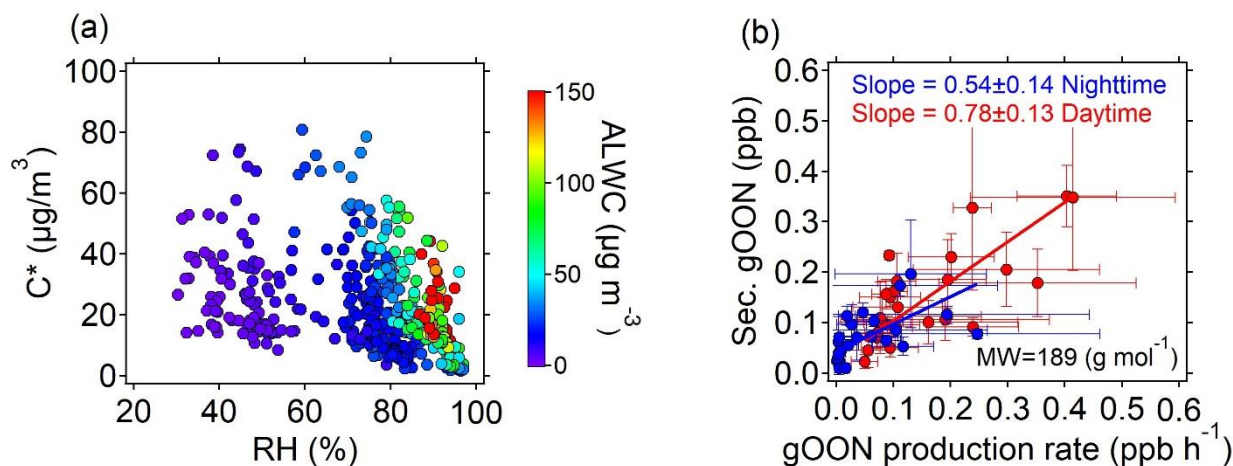

340 **Figure S24.** (a) Scatterplot of saturation mass concentration of total OON ( $C^* = 1/(C_p/C_{OA}/C_g)$ ) versus RH color-coded with  
 ALWC. (b) Scatter plot between secondary gOON concentration and gOON production rate. The regression slope can be  
 used to estimate the lifetime of gOON following Liebmann et al. (2019).

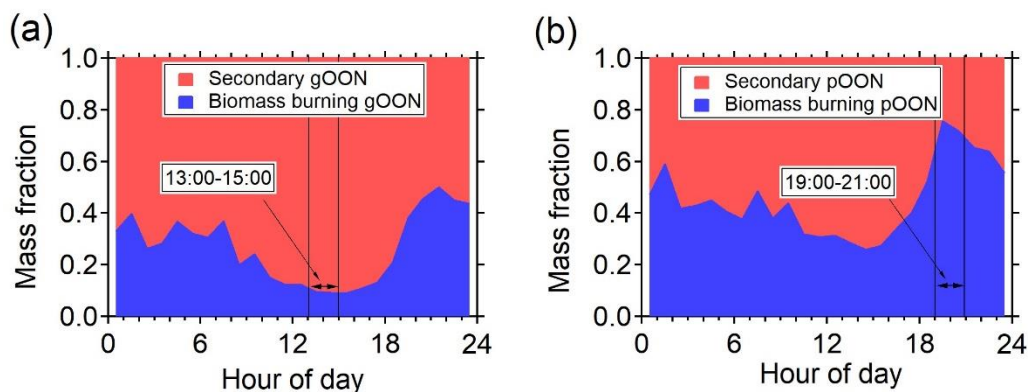

Figure S25. The average diurnal mass fractions of the contributions from secondary formation and biomass burning to (a) gOON and (b) pOON, respectively. The time periods of 13:00–15:00 and 19:00–21:00 represented the secondary formation dominated period and biomass burning dominated period for the particle phase, respectively.

## Reference

Ayres, B. R., Allen, H. M., Draper, D. C., Brown, S. S., Wild, R. J., Jimenez, J. L., Day, D. A., Campuzano-Jost, P., Hu, W., de Gouw, J., Koss, A., Cohen, R. C., Duffey, K. C., Romer, P., Baumann, K., Edgerton, E., Takahama, S., Thornton, J. A., Lee, B. H., Lopez-Hilfiker, F. D., Mohr, C., Wennberg, P. O., Nguyen, T. B., Teng, A., Goldstein, A. H., Olson, K., and Fry, J. L.: Organic nitrate aerosol formation via  $\text{NO}_3^+$  biogenic volatile organic compounds in the southeastern United States, *Atmos. Chem. Phys.*, 15, 13377-13392, <https://doi.org/10.5194/acp-15-13377-2015>, 2015.

Boyd, C. M., Sanchez, J., Xu, L., Eugene, A. J., Nah, T., Tuet, W. Y., Guzman, M. I., and Ng, N. L.: Secondary organic aerosol formation from the  $\beta$ -pinene+ $\text{NO}_3$  system: effect of humidity and peroxy radical fate, *Atmos. Chem. Phys.*, 15, 7497-7522, <https://doi.org/10.5194/acp-15-7497-2015>, 2015.

Brown, S. S. and Stutz, J.: Nighttime radical observations and chemistry, *Chem Soc Rev*, 41, 6405-6447, <https://doi.org/10.1039/c2cs35181a>, 2012.

Chen, Y., Takeuchi, M., Nah, T., Xu, L., Canagaratna, M. R., Stark, H., Baumann, K., Canonaco, F., Prévôt, A. S. H., Huey, L. G., Weber, R. J., and Ng, N. L.: Chemical characterization of secondary organic aerosol at a rural site in the southeastern US: insights from simultaneous high-resolution time-of-flight aerosol mass spectrometer (HR-ToF-AMS) and FIGAERO chemical ionization mass spectrometer (CIMS) measurements, *Atmos. Chem. Phys.*, 20, 8421-8440, <https://doi.org/10.5194/acp-20-8421-2020>, 2020.

Cubison, M. J., Ortega, A. M., Hayes, P. L., Farmer, D. K., Day, D., Lechner, M. J., Brune, W. H., Apel, E., Diskin, G. S., Fisher, J. A., Fuelberg, H. E., Hecobian, A., Knapp, D. J., Mikoviny, T., Riemer, D., Sachse, G. W., Sessions, W., Weber, R. J., Weinheimer, A. J., Wisthaler, A., and Jimenez, J. L.: Effects of aging on organic aerosol from open biomass burning smoke in aircraft and laboratory studies, *Atmos. Chem. Phys.*, 11, 12049-12064, <https://doi.org/10.5194/acp-11-12049-2011>, 2011.

Dai, Q., Schulze, B. C., Bi, X., Bui, A. A. T., Guo, F., Wallace, H. W., Sanchez, N. P., Flynn, J. H., Lefer, B. L., Feng, Y., and Griffin, R. J.: Seasonal differences in formation processes of oxidized organic aerosol near Houston, TX, *Atmos. Chem. Phys.*, 19, 9641-9661, [10.5194/acp-19-9641-2019](https://doi.org/10.5194/acp-19-9641-2019), 2019.

Dancey, C. and Reidy, J.: *Statistics without Maths for Psychology*, London: Prentice Hall Paerson.2007.

Day, D. A., Liu, S., Russell, L. M., and Ziemann, P. J.: Organonitrate group concentrations in submicron particles with high nitrate and organic fractions in coastal southern California, *Atmos. Environ.*, 44, 1970-1979, <https://doi.org/10.1016/j.atmosenv.2010.02.045>, 2010.

Day, D. A., Campuzano-Jost, P., Nault, B. A., Palm, B. B., Hu, W., Guo, H., Wooldridge, P. J., Cohen, R. C., Docherty, K. S., Huffman, J. A., de Sá, S. S., Martin, S. T., and Jimenez, J. L.: A systematic re-evaluation of methods for quantification of bulk particle-phase organic nitrates using real-time aerosol mass spectrometry, *Atmos. Meas. Tech.*, 15, 459-483, <https://doi.org/10.5194/amt-15-459-2022>, 2022.

- Farmer, D. K., Matsunaga, A., Docherty, K. S., Surratt, J. D., Seinfeld, J. H., Ziemann, P. J., and Jimenez, J. L.: Response of an aerosol mass spectrometer to organonitrates and organosulfates and implications for atmospheric chemistry, *Proc. Natl. Acad. Sci. U. S. A.*, 107, 6670-6675, <https://doi.org/10.1073/pnas.0912340107>, 2010.
- 380 Fisher, J. A., Jacob, D. J., Travis, K. R., Kim, P. S., Marais, E. A., Miller, C. C., Yu, K., Zhu, L., Yantosca, R. M., Sulprizio, M. P., Mao, J., Wennberg, P. O., Crouse, J. D., Teng, A. P., Nguyen, T. B., St Clair, J. M., Cohen, R. C., Romer, P., Nault, B. A., Wooldridge, P. J., Jimenez, J. L., Campuzano-Jost, P., Day, D. A., Hu, W., Shepson, P. B., Xiong, F., Blake, D. R., Goldstein, A. H., Misztal, P. K., Hanisco, T. F., Wolfe, G. M., Ryerson, T. B., Wisthaler, A., and Mikoviny, T.: Organic nitrate chemistry and its implications for nitrogen budgets in an isoprene- and monoterpene-rich atmosphere: constraints from aircraft (SEAC(4)RS) and  
385 ground-based (SOAS) observations in the Southeast US, *Atmos. Chem. Phys.*, 16, 5969-5991, <https://doi.org/10.5194/acp-16-5969-2016>, 2016.
- Fry, J. L., Draper, D. C., Zarzana, K. J., Campuzano-Jost, P., Day, D. A., Jimenez, J. L., Brown, S. S., Cohen, R. C., Kaser, L., Hansel, A., Cappellin, L., Karl, T., Roux, A. H., Turnipseed, A., Cantrell, C., Lefer, B. L., and Grossberg, N.: Observations of gas-  
390 and aerosol-phase organic nitrates at BEACHON-RoMBAS 2011, *Atmos. Chem. Phys.*, 13, 8585-8605, <https://doi.org/10.5194/acp-13-8585-2013>, 2013.
- Fry, J. L., Brown, S. S., Middlebrook, A. M., Edwards, P. M., Campuzano-Jost, P., Day, D. A., Jimenez, J. L., Allen, H. M., Ryerson, T. B., Pollack, I., Graus, M., Warneke, C., de Gouw, J. A., Brock, C. A., Gilman, J., Lerner, B. M., Dubé, W. P., Liao, J., and Welti, A.: Secondary organic aerosol (SOA) yields from NO<sub>3</sub> radical + isoprene based on nighttime aircraft power plant plume transects, *Atmos. Chem. Phys.*, 18, 11663-11682, <https://doi.org/10.5194/acp-18-11663-2018>, 2018.
- 395 Gkatzelis, G. I., Coggon, M. M., McDonald, B. C., Peischl, J., Aikin, K. C., Gilman, J. B., Trainer, M., and Warneke, C.: Identifying Volatile Chemical Product Tracer Compounds in U.S. Cities, *Environ. Sci. Technol.*, 55, 188-199, <https://doi.org/10.1021/acs.est.0c05467>, 2021.
- Hamilton, J. F., Bryant, D. J., Edwards, P. M., Ouyang, B., Bannan, T. J., Mehra, A., Mayhew, A. W., Hopkins, J. R., Dunmore, R. E., Squires, F. A., Lee, J. D., Newland, M. J., Worrall, S. D., Bacak, A., Coe, H., Percival, C., Whalley, L. K., Heard, D. E.,  
400 Slater, E. J., Jones, R. L., Cui, T., Surratt, J. D., Reeves, C. E., Mills, G. P., Grimmond, S., Sun, Y., Xu, W., Shi, Z., and Rickard, A. R.: Key Role of NO<sub>3</sub> Radicals in the Production of Isoprene Nitrates and Nitrooxyorganosulfates in Beijing, *Environ. Sci. Technol.*, 55, 842-853, <https://doi.org/10.1021/acs.est.0c05689>, 2021.
- Hao, L. Q., Kortelainen, A., Romakkaniemi, S., Portin, H., Jaatinen, A., Leskinen, A., Komppula, M., Miettinen, P., Sueper, D., Pajunoja, A., Smith, J. N., Lehtinen, K. E. J., Worsnop, D. R., Laaksonen, A., and Virtanen, A.: Atmospheric submicron aerosol  
405 composition and particulate organic nitrate formation in a boreal forestland–urban mixed region, *Atmos. Chem. Phys.*, 14, 13483-13495, <https://doi.org/10.5194/acp-14-13483-2014>, 2014.
- Harrison, R. M., Tilling, R., Callén Romero, M. a. S., Harrad, S., and Jarvis, K.: A study of trace metals and polycyclic aromatic hydrocarbons in the roadside environment, *Atmos. Environ.*, 37, 2391-2402, [https://doi.org/10.1016/S1352-2310\(03\)00122-5](https://doi.org/10.1016/S1352-2310(03)00122-5), 2003.
- 410 Hayes, P. L., Ortega, A. M., Cubison, M. J., Froyd, K. D., Zhao, Y., Cliff, S. S., Hu, W. W., Toohey, D. W., Flynn, J. H., Lefer, B. L., Grossberg, N., Alvarez, S., Rappenglück, B., Taylor, J. W., Allan, J. D., Holloway, J. S., Gilman, J. B., Kuster, W. C., de Gouw, J. A., Massoli, P., Zhang, X., Liu, J., Weber, R. J., Corrigan, A. L., Russell, L. M., Isaacman, G., Worton, D. R., Kreisberg, N. M., Goldstein, A. H., Thalman, R., Waxman, E. M., Volkamer, R., Lin, Y. H., Surratt, J. D., Kleindienst, T. E., Offenberg, J. H., Dusanter, S., Griffith, S., Stevens, P. S., Brioude, J., Angevine, W. M., and Jimenez, J. L.: Organic aerosol composition and  
415 sources in Pasadena, California, during the 2010 CalNex campaign, *J. Geophys. Res.: Atmos.*, 118, 9233-9257, [10.1002/jgrd.50530](https://doi.org/10.1002/jgrd.50530), 2013.
- Hilas, C. S., Goudos, S. K., and Sahalos, J. N.: Seasonal decomposition and forecasting of telecommunication data: A comparative case study, *Technological Forecasting and Social Change*, 73, 495-509, <https://doi.org/10.1016/j.techfore.2005.07.002>, 2006.
- 420 Hu, W., Hu, M., Hu, W., Jimenez, J. L., Yuan, B., Chen, W., Wang, M., Wu, Y., Chen, C., Wang, Z., Peng, J., Zeng, L., and Shao, M.: Chemical composition, sources, and aging process of submicron aerosols in Beijing: Contrast between summer and winter, *J. Geophys. Res.: Atmos.*, 121, 1955-1977, [10.1002/2015jd024020](https://doi.org/10.1002/2015jd024020), 2016.
- Huffman, J. A., Ziemann, P. J., Jayne, J. T., Worsnop, D. R., and Jimenez, J. L.: Development and Characterization of a Fast-Stepping/Scanning Thermodesorber for Chemically-Resolved Aerosol Volatility Measurements, *Aerosol Sci. Technol.*, 42, 395-407, <https://doi.org/10.1080/02786820802104981>, 2008.

- 425 Kiendler-Scharr, A., Mensah, A. A., Friese, E., Topping, D., Nemitz, E., Prevot, A. S. H., Äijälä, M., Allan, J., Canonaco, F., Canagaratna, M., Carbone, S., Crippa, M., Dall'Osto, M., Day, D. A., De Carlo, P., Di Marco, C. F., Elbern, H., Eriksson, A., Freney, E., Hao, L., Herrmann, H., Hildebrandt, L., Hillamo, R., Jimenez, J. L., Laaksonen, A., McFiggans, G., Mohr, C., O'Dowd, C., Otjes, R., Ovadnevaite, J., Pandis, S. N., Poulain, L., Schlag, P., Sellegri, K., Swietlicki, E., Tiitta, P., Vermeulen, A., Wahner, A., Worsnop, D., and Wu, H. C.: Ubiquity of organic nitrates from nighttime chemistry in the European submicron aerosol, *Geophys. Res. Lett.*, 43, 7735-7744, <https://doi.org/10.1002/2016gl069239>, 2016.
- 430 Koch, B. P. and Dittmar, T.: From mass to structure: an aromaticity index for high-resolution mass data of natural organic matter, *Rapid Commun. Mass Spectrom.*, 20, 926-932, <https://doi.org/10.1002/rcm.2386>, 2006.
- Koch, B. P. and Dittmar, T.: From mass to structure: an aromaticity index for high-resolution mass data of natural organic matter, *Rapid Commun. Mass Spectrom.*, 30, 250-250, <https://doi.org/10.1002/rcm.7433>, 2016.
- 435 Krecl, P., Johansson, C., Targino, A. C., Ström, J., and Burman, L.: Trends in black carbon and size-resolved particle number concentrations and vehicle emission factors under real-world conditions, *Atmos. Environ.*, 165, 155-168, <https://doi.org/10.1016/j.atmosenv.2017.06.036>, 2017.
- Lanz, V. A., Prévôt, A. S. H., Alfarra, M. R., Weimer, S., Mohr, C., DeCarlo, P. F., Gianini, M. F. D., Hueglin, C., Schneider, J., Favez, O., D'Anna, B., George, C., and Baltensperger, U.: Characterization of aerosol chemical composition with aerosol mass spectrometry in Central Europe: an overview, *Atmos. Chem. Phys.*, 10, 10453-10471, <https://doi.org/10.5194/acp-10-10453-2010>, 2010.
- 440 Lee, A. K. Y., Adam, M. G., Liggió, J., Li, S.-M., Li, K., Willis, M. D., Abbatt, J. P. D., Tokarek, T. W., Odame-Ankrah, C. A., Osthoff, H. D., Strawbridge, K., and Brook, J. R.: A large contribution of anthropogenic organo-nitrates to secondary organic aerosol in the Alberta oil sands, *Atmos. Chem. Phys.*, 19, 12209-12219, <https://doi.org/10.5194/acp-19-12209-2019>, 2019.
- 445 Li, X. B., Yuan, B., Wang, S., Wang, C., Lan, J., Liu, Z., Song, Y., He, X., Huangfu, Y., Pei, C., Cheng, P., Yang, S., Qi, J., Wu, C., Huang, S., You, Y., Chang, M., Zheng, H., Yang, W., Wang, X., and Shao, M.: Variations and sources of volatile organic compounds (VOCs) in urban region: insights from measurements on a tall tower, *Atmos. Chem. Phys.*, 22, 10567-10587, <https://doi.org/10.5194/acp-22-10567-2022>, 2022.
- 450 Liebmann, J., Sobanski, N., Schuladen, J., Karu, E., Hellén, H., Hakola, H., Zha, Q., Ehn, M., Riva, M., Heikkinen, L., Williams, J., Fischer, H., Lelieveld, J., and Crowley, J. N.: Alkyl nitrates in the boreal forest: formation via the NO<sub>3</sub>-, OH- and O<sub>3</sub> induced oxidation of biogenic volatile organic compounds and ambient lifetimes, *Atmos. Chem. Phys.*, 19, 10391-10403, <https://doi.org/10.5194/acp-19-10391-2019>, 2019.
- McKay, M. D., Beckman, R. J., and Conover, W. J.: A Comparison of Three Methods for Selecting Values of Input Variables in the Analysis of Output From a Computer Code, *Technometrics*, 42, 55-61, <https://doi.org/10.1080/00401706.2000.10485979>, 2000.
- 455 Nault, B. A., Jo, D. S., McDonald, B. C., Campuzano-Jost, P., Day, D. A., Hu, W., Schroder, J. C., Allan, J., Blake, D. R., Canagaratna, M. R., Coe, H., Coggon, M. M., DeCarlo, P. F., Diskin, G. S., Dunmore, R., Flocke, F., Fried, A., Gilman, J. B., Gkatzelis, G., Hamilton, J. F., Hanisco, T. F., Hayes, P. L., Henze, D. K., Hodzic, A., Hopkins, J., Hu, M., Huey, L. G., Jobson, B. T., Kuster, W. C., Lewis, A., Li, M., Liao, J., Nawaz, M. O., Pollack, I. B., Peischl, J., Rappenglück, B., Reeves, C. E., Richter, D., Roberts, J. M., Ryerson, T. B., Shao, M., Sommers, J. M., Walega, J., Warneke, C., Weibring, P., Wolfe, G. M., Young, D. E.,
- 460 Yuan, B., Zhang, Q., de Gouw, J. A., and Jimenez, J. L.: Secondary organic aerosols from anthropogenic volatile organic compounds contribute substantially to air pollution mortality, *Atmos. Chem. Phys.*, 21, 11201-11224, [10.5194/acp-21-11201-2021](https://doi.org/10.5194/acp-21-11201-2021), 2021.
- Ng, N. L., Brown, S. S., Archibald, A. T., Atlas, E., Cohen, R. C., Crowley, J. N., Day, D. A., Donahue, N. M., Fry, J. L., Fuchs, H., Griffin, R. J., Guzman, M. I., Herrmann, H., Hodzic, A., Iinuma, Y., Jimenez, J. L., Kiendler-Scharr, A., Lee, B. H., Luecken, D. J., Mao, J., McLaren, R., Mutzel, A., Osthoff, H. D., Ouyang, B., Picquet-Varrault, B., Platt, U., Pye, H. O. T., Rudich, Y., Schwantes, R. H., Shiraiwa, M., Stutz, J., Thornton, J. A., Tilgner, A., Williams, B. J., and Zaveri, R. A.: Nitrate radicals and biogenic volatile organic compounds: oxidation, mechanisms, and organic aerosol, *Atmos. Chem. Phys.*, 17, 2103-2162, <https://doi.org/10.5194/acp-17-2103-2017>, 2017.
- 465 Rollins, A. W., Browne, E. C., Min, K. E., Pusede, S. E., Wooldridge, P. J., Gentner, D. R., Goldstein, A. H., Liu, S., Day, D. A., Russell, L. M., and Cohen, R. C.: Evidence for NO(x) control over nighttime SOA formation, *Science*, 337, 1210-1212, <https://doi.org/10.1126/science.1221520>, 2012.



- Salvador, C. M., Chou, C. C. K., Cheung, H. C., Ho, T. T., Tsai, C. Y., Tsao, T. M., Tsai, M. J., and Su, T. C.: Measurements of submicron organonitrate particles: Implications for the impacts of NO<sub>x</sub> pollution in a subtropical forest, *Atmospheric Research*, 245, <https://doi.org/10.1016/j.atmosres.2020.105080>, 2020.
- 475 Sato, K., Takami, A., Iozaki, T., Hikida, T., Shimono, A., and Imamura, T.: Mass spectrometric study of secondary organic aerosol formed from the photo-oxidation of aromatic hydrocarbons, *Atmos. Environ.*, 44, 1080-1087, <https://doi.org/10.1016/j.atmosenv.2009.12.013>, 2010.
- Singla, V., Mukherjee, S., Pandithurai, G., Dani, K. K., and Safai, P. D.: Evidence of Organonitrate Formation at a High Altitude Site, Mahabaleshwar, during the Pre-monsoon Season, *Aerosol and Air Quality Research*, 19, 1241-1251, 480 <https://doi.org/10.4209/aaqr.2018.03.0110>, 2019.
- Sommers, J. M., Stroud, C. A., Adam, M. G., O'Brien, J., Brook, J. R., Hayden, K., Lee, A. K. Y., Li, K., Liggio, J., Mihele, C., Mittermeier, R. L., Stevens, R. G., Wolde, M., Zuend, A., and Hayes, P. L.: Evaluating SOA formation from different sources of semi- and intermediate-volatility organic compounds from the Athabasca oil sands, *Environmental Science: Atmospheres*, 2, 469-490, <https://doi.org/10.1039/D1EA00053E>, 2022.
- 485 Sun, Y. L., Zhang, Q., Schwab, J. J., Yang, T., Ng, N. L., and Demerjian, K. L.: Factor analysis of combined organic and inorganic aerosol mass spectra from high resolution aerosol mass spectrometer measurements, *Atmos. Chem. Phys.*, 12, 8537-8551, <https://doi.org/10.5194/acp-12-8537-2012>, 2012.
- Takeuchi, M. and Ng, N. L.: Chemical composition and hydrolysis of organic nitrate aerosol formed from hydroxyl and nitrate radical oxidation of  $\alpha$ -pinene and  $\beta$ -pinene, *Atmos. Chem. Phys.*, 19, 12749-12766, <https://doi.org/10.5194/acp-19-12749-2019>, 490 2019.
- Urban, R. C., Lima-Souza, M., Caetano-Silva, L., Queiroz, M. E. C., Nogueira, R. F. P., Allen, A. G., Cardoso, A. A., Held, G., and Campos, M. L. A. M.: Use of levoglucosan, potassium, and water-soluble organic carbon to characterize the origins of biomass-burning aerosols, *Atmos. Environ.*, 61, 562-569, <https://doi.org/10.1016/j.atmosenv.2012.07.082>, 2012.
- 495 Wang, H., Lu, K., Chen, X., Zhu, Q., Chen, Q., Guo, S., Jiang, M., Li, X., Shang, D., Tan, Z., Wu, Y., Wu, Z., Zou, Q., Zheng, Y., Zeng, L., Zhu, T., Hu, M., and Zhang, Y.: High N<sub>2</sub>O<sub>5</sub> Concentrations Observed in Urban Beijing: Implications of a Large Nitrate Formation Pathway, *Environmental Science & Technology Letters*, 4, 416-420, <https://doi.org/10.1021/acs.estlett.7b00341>, 2017.
- Wang, S., Peng, Y., Peng, Q., Wu, C., Wang, C., Wang, B., Wang, Z., Kuang, Y., Song, W., Wang, X., Hu, W., Chen, W., Shen, J., Chen, D., Shao, M., and Yuan, B.: Different chemical removal pathways of volatile organic compounds (VOCs): Comparison of urban and regional sites, *Acta Sci. Circumstantiae*, 40, 2311-2322, <https://doi.org/10.13671/j.hjxxb.2020.0153>, 2020.
- 500 Wang, Y., Hu, M., Lin, P., Tan, T., Li, M., Xu, N., Zheng, J., Du, Z., Qin, Y., Wu, Y., Lu, S., Song, Y., Wu, Z., Guo, S., Zeng, L., Huang, X., and He, L.: Enhancement in Particulate Organic Nitrogen and Light Absorption of Humic-Like Substances over Tibetan Plateau Due to Long-Range Transported Biomass Burning Emissions, *Environ. Sci. Technol.*, 53, 14222-14232, <https://doi.org/10.1021/acs.est.9b06152>, 2019.
- 505 Wolfe, G. M., Marvin, M. R., Roberts, S. J., Travis, K. R., and Liao, J.: The Framework for 0-D Atmospheric Modeling (F0AM) v3.1, *Geosci. Model Dev.*, 9, 3309-3319, <https://doi.org/10.5194/gmd-9-3309-2016>, 2016.
- Wood, E. C., Canagaratna, M. R., Herndon, S. C., Onasch, T. B., Kolb, C. E., Worsnop, D. R., Kroll, J. H., Knighton, W. B., Seila, R., Zavala, M., Molina, L. T., DeCarlo, P. F., Jimenez, J. L., Weinheimer, A. J., Knapp, D. J., Jobson, B. T., Stutz, J., Kuster, W. C., and Williams, E. J.: Investigation of the correlation between odd oxygen and secondary organic aerosol in Mexico City and Houston, *Atmos. Chem. Phys.*, 10, 8947-8968, [10.5194/acp-10-8947-2010](https://doi.org/10.5194/acp-10-8947-2010), 2010.
- 510 Xu, L., Suresh, S., Guo, H., Weber, R. J., and Ng, N. L.: Aerosol characterization over the southeastern United States using high-resolution aerosol mass spectrometry: spatial and seasonal variation of aerosol composition and sources with a focus on organic nitrates, *Atmos. Chem. Phys.*, 15, 7307-7336, <https://doi.org/10.5194/acp-15-7307-2015>, 2015.
- 515 Xu, W., Takeuchi, M., Chen, C., Qiu, Y., Xie, C., Xu, W., Ma, N., Worsnop, D. R., Ng, N. L., and Sun, Y.: Estimation of particulate organic nitrates from thermodenuder-aerosol mass spectrometer measurements in the North China Plain, *Atmos. Meas. Tech.*, 14, 3693-3705, <https://doi.org/10.5194/amt-14-3693-2021>, 2021.

Xu, W., Han, T., Du, W., Wang, Q., Chen, C., Zhao, J., Zhang, Y., Li, J., Fu, P., Wang, Z., Worsnop, D. R., and Sun, Y.: Effects of Aqueous-Phase and Photochemical Processing on Secondary Organic Aerosol Formation and Evolution in Beijing, China, *Environ. Sci. Technol.*, 51, 762-770, [10.1021/acs.est.6b04498](https://doi.org/10.1021/acs.est.6b04498), 2017.

520 Ye, C., Yuan, B., Lin, Y., Wang, Z., Hu, W., Li, T., Chen, W., Wu, C., Wang, C., Huang, S., Qi, J., Wang, B., Wang, C., Song, W., Wang, X., Zheng, E., Krechmer, J. E., Ye, P., Zhang, Z., Wang, X., Worsnop, D. R., and Shao, M.: Chemical characterization of oxygenated organic compounds in the gas phase and particle phase using iodide CIMS with FIGAERO in urban air, *Atmos. Chem. Phys.*, 21, 8455-8478, <https://doi.org/10.5194/acp-21-8455-2021>, 2021.

525 Yu, K., Zhu, Q., Du, K., and Huang, X.-F.: Characterization of nighttime formation of particulate organic nitrates based on high-resolution aerosol mass spectrometry in an urban atmosphere in China, *Atmos. Chem. Phys.*, 19, 5235-5249, <https://doi.org/10.5194/acp-19-5235-2019>, 2019.

Zhan, B., Zhong, H., Chen, H., Chen, Y., Li, X., Wang, L., Wang, X., Mu, Y., Huang, R.-J., George, C., and Chen, J.: The roles of aqueous-phase chemistry and photochemical oxidation in oxygenated organic aerosols formation, *Atmos. Environ.*, 266, 118738, <https://doi.org/10.1016/j.atmosenv.2021.118738>, 2021.

530 Zhang, C., Lu, X., Zhai, J., Chen, H., Yang, X., Zhang, Q., Zhao, Q., Fu, Q., Sha, F., and Jin, J.: Insights into the formation of secondary organic carbon in the summertime in urban Shanghai, *JEnvS*, 72, 118-132, <https://doi.org/10.1016/j.jes.2017.12.018>, 2018.

535 Zhu, Q., He, L. Y., Huang, X. F., Cao, L. M., Gong, Z. H., Wang, C., Zhuang, X., and Hu, M.: Atmospheric aerosol compositions and sources at two national background sites in northern and southern China, *Atmos. Chem. Phys.*, 16, 10283-10297, <https://doi.org/10.5194/acp-16-10283-2016>, 2016.
